# Supplementary material for: Energy-resolved mass spectrometry to investigate nucleobase triplexes – a study applied to triplex-forming artificial nucleobases
Source: Royal Society of Chemistry journal article supplement (doi:10.1039/d2nj00665k), 2022-01-01
Supplement: d2nj00665k1.pdf [file d2nj00665k1.pdf]

## Supporting Information

### **Energy-Resolved Mass Spectrometry to investigate nucleobase triplexes - a study applied to triplex-forming artificial nucleobase**

Mauro Safir Filho,<sup>1</sup> Lionel Massi,<sup>1</sup> Antoine Millet,<sup>1</sup> Dylan Michel,<sup>1</sup> Wafa Moussa,<sup>1</sup> Cyril Ronco,<sup>1</sup> and Rachid Benhida<sup>1,2</sup>

<sup>1</sup> Institut de Chimie de Nice CRNS UMR7272, Université Côte d'Azur, 28 Avenue Valrose 06108 Nice, France.

<sup>2</sup> Mohamed VI Polytechnic University, UM6P, 43150, Ben Guerir, Morocco.

[cyril.ronco@univ-cotedazur.fr](mailto:cyril.ronco@univ-cotedazur.fr)

[rachid.benhida@univ-cotedazur.fr](mailto:rachid.benhida@univ-cotedazur.fr)

## Synthesis

*General procedure for the reduction of nitro group.* To a suspension of corresponding nitro-aryl (1 eq) and Pd/C – 10% (10% wt.) in methanol (0.01 M), under stirring and at 0°C, was added carefully by portions sodium borohydride (5 eq). The reaction mixture was stirred at 0°C until complete dissolution of sodium borohydride and was then allowed to react at r.t. The crude mixture was filtered through a pad of celite, concentrated under reduced pressure and purified by silica gel column chromatography to afford corresponding amino product.

*General procedure for the amide synthesis.* To a solution of the corresponding anilines (1 equiv) under argon in anhydrous pyridine (0.3 M) was added the corresponding acyl chloride or anhydride (1.1 equiv). The reaction mixture was allowed to react at rt until complete conversion of the starting material (approximately 2h), and pyridine was removed under reduced pressure. The crude material was dissolved in 50 mL of ethyl acetate. The aqueous layer was washed twice with 1 M aq HCL solution (50 mL), then washed two times with saturated aq NaHCO<sub>3</sub> solution (50 mL) and brine (50 mL) and dried with MgSO<sub>4</sub> to afford the corresponding amide

*General procedure for the urea synthesis.* To a solution of 2-methylbenzo[d]oxazol-5-amine **3** (0.55 mmol, 1 eq.) in anhydrous DCM (0.05 M) was added the corresponding isocyanate (0.66 mmol, 1.2 eq.) and the mixture was stirred for 2 hours at room temperature. The formed precipitate was removed by filtration and washed with DCM (3 × 5 mL) to afford the corresponding urea as light solids.

### Scheme 1. Synthetic route to **S** nucleobase analogues **S**<sub>1-9</sub>

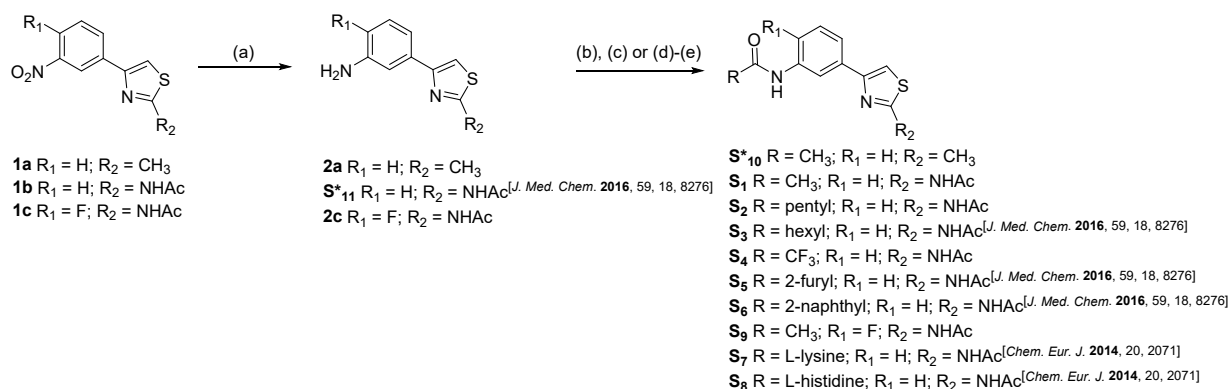

Reagents and conditions. I) NaBH<sub>4</sub>, Pd/C (10%), MeOH/DCM (1/1), r.t., overnight. b) corresponding anhydride, pyridine, r.t., 2h (for **S\*<sub>10</sub>**, **S<sub>4</sub>**, **S<sub>1</sub>** and **S<sub>9</sub>**); c) corresponding acyl chloride, pyridine, r.t., 2h (for **S<sub>2</sub>**, **S<sub>3</sub>**, **S<sub>6</sub>**, **S<sub>7</sub>**); d) corresponding *N*-Boc protected amino acid, 2-chloro-1-methylpyridinium iodide, Et<sub>3</sub>N, CH<sub>2</sub>Cl<sub>2</sub>, reflux, 3h (for **S<sub>7</sub>** and **S<sub>8</sub>**); e) 50% TFA, CH<sub>2</sub>Cl<sub>2</sub>, r.t., 24 h.

## 2a

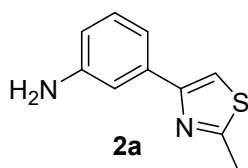

The general procedure for the reduction of nitro group was followed using **1a** (1.1 g, 5.0 mmol), Pd/C and NaBH<sub>4</sub> (1.04 g) to afford compound **2a** in 76% yield (722 mg).

<sup>1</sup>H NMR (200 MHz, MeOD-*d*<sub>4</sub>) δ 7.45 (s, 1H), 7.28 – 7.06 (m, 3H), 6.70 (dt, *J* = 6.5, 2.3 Hz, 1H), 2.70 (s, 3H).

<sup>13</sup>C NMR (50 MHz, MeOD-*d*<sub>4</sub>) δ 167.9, 156.6, 149.1, 136.4, 130.4, 117.3, 116.4, 114.3, 113.8, 18.8.

## 2c

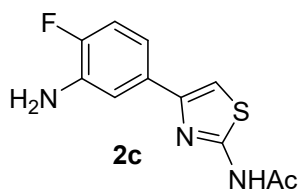

The general procedure for the reduction of nitro group was followed using **1c** (1.4 g, 5.0 mmol), Pd/C and NaBH<sub>4</sub> (1.04 g) to afford compound **2a** in 54% yield (677 mg).

<sup>1</sup>H NMR (400 MHz, DMSO) δ 12.21 (s, 1H), 7.34 (s, 1H), 7.29 – 7.23 (m, 1H), 7.01 (dd, *J* = 5.7, 4.1 Hz, 2H), 5.21 (s, 2H), 2.15 (s, 3H).

<sup>19</sup>F NMR (377 MHz, DMSO) δ -135.90.

<sup>13</sup>C NMR (101 MHz, DMSO) δ 168.9, 157.7, 151.6, 149.2, 148.6, 136.4 (d, *J* = 13.3 Hz), 130.9 (d, *J* = 3.0 Hz), 115.1 (d, *J* = 18.8 Hz), 113.6 (d, *J* = 5.4 Hz), 106.7, 22.5.

## S\*<sub>10</sub>

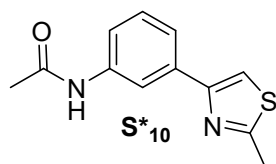

The general procedure for the amide synthesis was followed using **2a** (190 mg, 1.0 mmol, 1 eq.) and Ac<sub>2</sub>O (102 μL, 1.1 mmol, 1.1 eq.) to afford **S\*<sub>10</sub>** in 72% (167 mg).

<sup>1</sup>H NMR (200 MHz, MeOD-*d*<sub>4</sub>) δ 8.04 (s, 1H), 7.66 – 7.47 (m, 3H), 7.33 (t, *J* = 7.9 Hz, 1H), 2.72 (s, 3H), 2.14 (s, 3H).

<sup>13</sup>C NMR (50 MHz, MeOD-*d*<sub>4</sub>) δ 171.7, 168.2, 155.9, 140.3, 136.3, 130.2, 123.1, 120.8, 119.0, 114.5, 23.9, 18.8.

**S<sub>1</sub>**

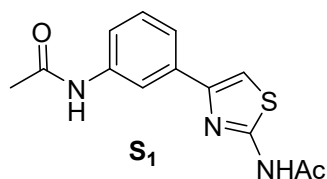

The general procedure for the amide synthesis was followed using **2b** (233 mg, 1.0 mmol, 1 eq.) and Ac<sub>2</sub>O (102 μL, 1.1 mmol, 1.1 eq.) to afford **S<sub>1</sub>** in 81% (222 mg).

<sup>1</sup>H NMR (400 MHz, DMSO-*d*<sub>6</sub>) δ 12.27 (s, 1H), 10.00 (s, 1H), 8.22 (s, 1H), 7.54 (d, *J* = 7.7 Hz, 1H), 7.48 (s, 1H), 7.41 (d, *J* = 8.1 Hz, 1H), 7.32 (t, *J* = 7.9 Hz, 1H), 2.16 (s, 3H), 2.06 (s, 3H).

<sup>13</sup>C NMR (101 MHz, DMSO-*d*<sub>6</sub>) δ 168.7, 168.3, 157.9, 148.7, 139.7, 134.8, 129.0, 120.5, 118.5, 116.6, 107.9, 24.1, 22.5.

**S<sub>2</sub>**

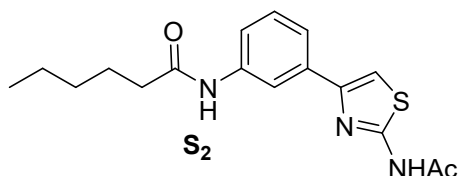

The general procedure for the amide synthesis was followed using **2b** (233 mg, 1.0 mmol, 1 eq.) and hexanoyl chloride (140 μL, 1.1 mmol, 1.1 eq.) to afford **S<sub>2</sub>** in 49% (162 mg).

<sup>1</sup>H NMR (200 MHz, MeOD-*d*<sub>4</sub>) δ 8.14 (t, *J* = 1.7 Hz, 1H), 7.62 (dt, *J* = 7.6, 1.4 Hz, 1H), 7.50 – 7.41 (m, 1H), 7.37 – 7.26 (m, 2H), 2.38 (t, *J* = 7.5 Hz, 2H), 2.22 (s, 3H), 1.80 – 1.63 (m, 2H), 1.41 – 1.34 (m, 4H), 0.94 (t, *J* = 5.9 Hz, 3H).

<sup>13</sup>C NMR (50 MHz, MeOD-*d*<sub>4</sub>) δ 174.8, 170.9, 159.4, 150.9, 140.2, 136.6, 130.0, 122.8, 120.7, 118.9, 108.8, 38.0, 32.6, 26.7, 23.5, 22.6, 14.3.

**S<sub>4</sub>**

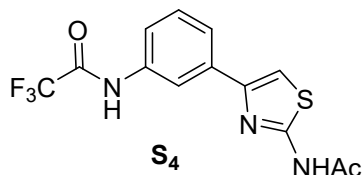

The general procedure for the amide synthesis was followed using **2b** (233 mg, 1.0 mmol, 1 eq.) and trifluoroacetic anhydride (154 μL, 1.1 mmol, 1.1 eq.) to afford **S<sub>4</sub>** in 32% (105 mg).

<sup>1</sup>H NMR (400 MHz, Acetone-*d*<sub>6</sub>) δ 11.15 (s, 1H), 10.29 (s, 1H), 8.38 (t, *J* = 1.8 Hz, 1H), 7.81 – 7.73 (m, 1H), 7.58 (ddd, *J* = 8.1, 2.1, 1.0 Hz, 1H), 7.46 – 7.42 (m, 2H), 2.29 (s, 3H).

<sup>19</sup>F NMR (377 MHz, Acetone-*d*<sub>6</sub>) δ -76.22.

$^{13}\text{C}$  NMR (101 MHz, Acetone- $d_6$ )  $\delta$  206.2, 159.0 (d, 9.9 Hz), 158.9, 149.6, 137.7, 136.6, 130.2, 124.0, 120.9, 119.4, 108.9, 22.8.

**S<sub>9</sub>**

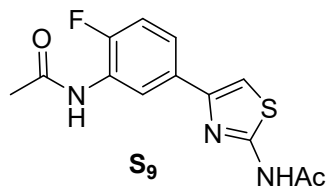

The general procedure for the amide synthesis was followed using **2c** (251 mg, 1.0 mmol, 1 eq.) and Ac<sub>2</sub>O (102  $\mu\text{L}$ , 1.1 mmol, 1.1 eq.) to afford **S<sub>9</sub>** in 62% (181 mg).

$^1\text{H}$  NMR (400 MHz, DMSO- $d_6$ )  $\delta$  12.29 (s, 1H), 9.77 (s, 1H), 8.45 (d,  $J$  = 6.3 Hz, 1H), 7.65 – 7.59 (m, 1H), 7.52 (s, 1H), 7.29 (dd,  $J$  = 10.6, 8.7 Hz, 1H), 2.16 (s, 3H), 2.11 (s, 3H).

$^{19}\text{F}$  NMR (377 MHz, DMSO- $d_6$ )  $\delta$  -126.11.

$^{13}\text{C}$  NMR (101 MHz, DMSO- $d_6$ )  $\delta$  168.7, 168.7, 158.0, 155.9, 154.3, 147.7, 130.7 (d,  $J$  = 3.1 Hz), 126.4 (d,  $J$  = 12.1 Hz), 122.2 (d,  $J$  = 7.6 Hz), 121.6, 115.7 (d,  $J$  = 20.2 Hz), 107.8, 23.6, 22.5.

*Scheme 2.* Synthetic route to **HB** nucleobase analogues **HB<sub>1-5</sub>**

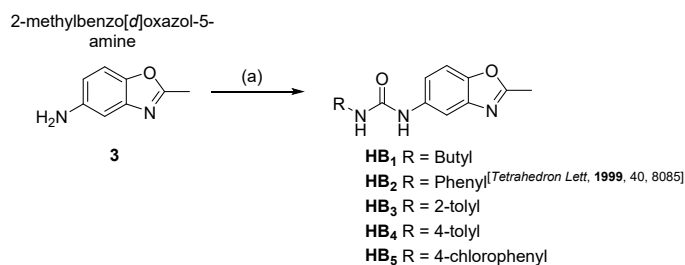

Reagents and conditions. a) RNCO, DCM, r.t., 2 hours.

**HB<sub>1</sub>**

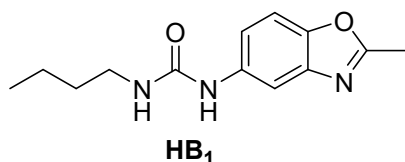

The general procedure for the urea synthesis was followed using **3** (80 mg) and butyl isocyanate (59 mg) to afford **HB<sub>1</sub>** in 79% yield (105 mg).

$^1\text{H}$  NMR (200 MHz, MeOD- $d_4$ )  $\delta$  7.73 (d,  $J$  = 2.1 Hz, 1H), 7.41 (d,  $J$  = 8.8 Hz, 1H), 7.21 (dd,  $J$  = 8.8, 2.1 Hz, 1H), 3.20 (t,  $J$  = 6.8 Hz, 2H), 2.59 (s, 3H), 1.59 – 1.32 (m, 4H), 0.96 (t,  $J$  = 7.1 Hz, 3H).

$^{13}\text{C}$  NMR (50 MHz, MeOD- $d_4$ )  $\delta$  166.7, 158.5, 148.0, 142.4, 138.1, 118.3, 111.1, 110.6, 40.6, 33.4, 21.0, 14.1.

### HB<sub>3</sub>

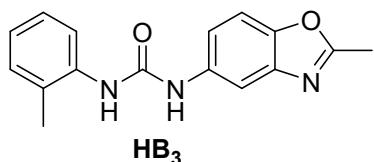

The general procedure for the urea synthesis was followed using **3** (80 mg) and o-tolyl isocyanate (82  $\mu\text{L}$ ) to afford **HB<sub>3</sub>** in 67% yield (101 mg).

$^1\text{H}$  NMR (200 MHz, DMSO- $d_6$ )  $\delta$  9.13 (s, 1H), 7.93 (s, 1H), 7.89 (d,  $J$  = 1.9 Hz, 1H), 7.84 (d,  $J$  = 8.2 Hz, 1H), 7.55 (d,  $J$  = 8.7 Hz, 1H), 7.25 (dd,  $J$  = 8.8, 2.1 Hz, 1H), 7.15 (t,  $J$  = 7.9 Hz, 2H), 7.00 – 6.88 (m, 1H), 2.58 (s, 3H), 2.25 (s, 3H).

$^{13}\text{C}$  NMR (50 MHz, DMSO- $d_6$ )  $\delta$  164.4, 152.9, 145.7, 141.5, 137.4, 136.6, 130.2, 127.6, 126.2, 122.7, 121.1, 115.6, 110.1, 108.3, 17.9, 14.2.

### HB<sub>4</sub>

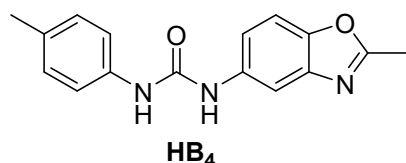

The general procedure for the urea synthesis was followed using **3** (80 mg) and o-tolyl isocyanate (82  $\mu\text{L}$ ) to afford **HB<sub>4</sub>** in 66% yield (100 mg).

$^1\text{H}$  NMR (200 MHz, DMSO- $d_6$ )  $\delta$  8.73 (s, 1H), 8.57 (s, 1H), 7.85 (d,  $J$  = 1.9 Hz, 1H), 7.53 (d,  $J$  = 8.7 Hz, 1H), 7.34 (d,  $J$  = 8.4 Hz, 2H), 7.25 (dd,  $J$  = 8.8, 2.1 Hz, 1H), 7.08 (d,  $J$  = 8.3 Hz, 1H), 2.58 (s, 3H), 2.24 (s, 3H).

$^{13}\text{C}$  NMR (50 MHz, DMSO- $d_6$ )  $\delta$  164.4, 152.8, 145.8, 141.5, 137.1, 136.5, 130.6, 129.2, 118.3, 115.8, 110.1, 108.5, 20.3, 14.2.

**HB<sub>5</sub>**

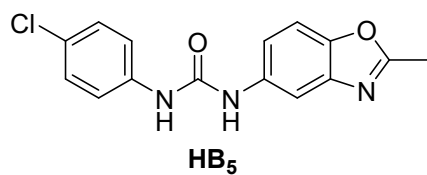

The general procedure for the urea synthesis was followed using **3** (80 mg) and o-tolyl isocyanate (100 mg) to afford **HB<sub>5</sub>** in 51% yield (76 mg).

<sup>1</sup>H NMR (200 MHz, DMSO-*d*<sub>6</sub>) δ 8.83 (d, *J* = 3.9 Hz, 2H), 7.85 (d, *J* = 1.9 Hz, 1H), 7.58 – 7.42 (m, 3H), 7.35 – 7.19 (m, 3H), 2.58 (s, 3H).

<sup>13</sup>C NMR (50 MHz, DMSO-*d*<sub>6</sub>) δ 164.5, 152.7, 145.9, 141.5, 138.8, 136.2, 128.6, 125.3, 119.8, 115.9, 110.1, 108.8, 14.2.

S\*<sub>10</sub>

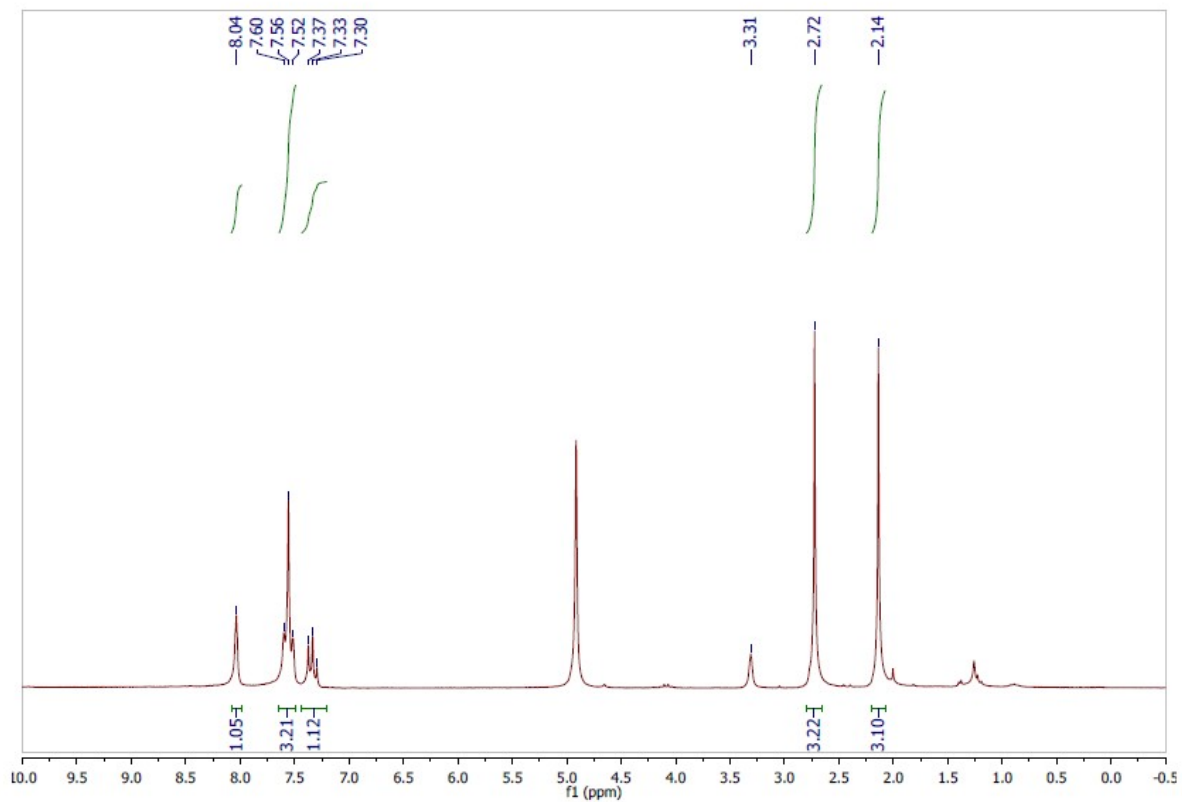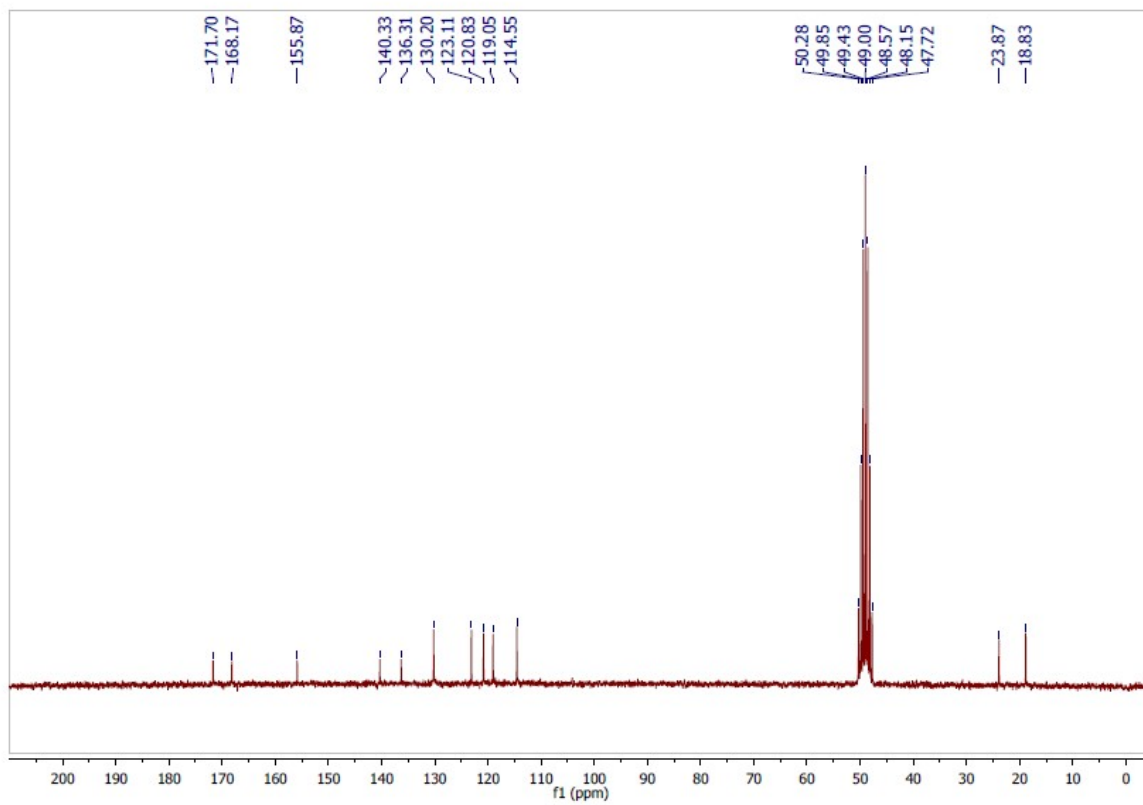



S<sub>1</sub>

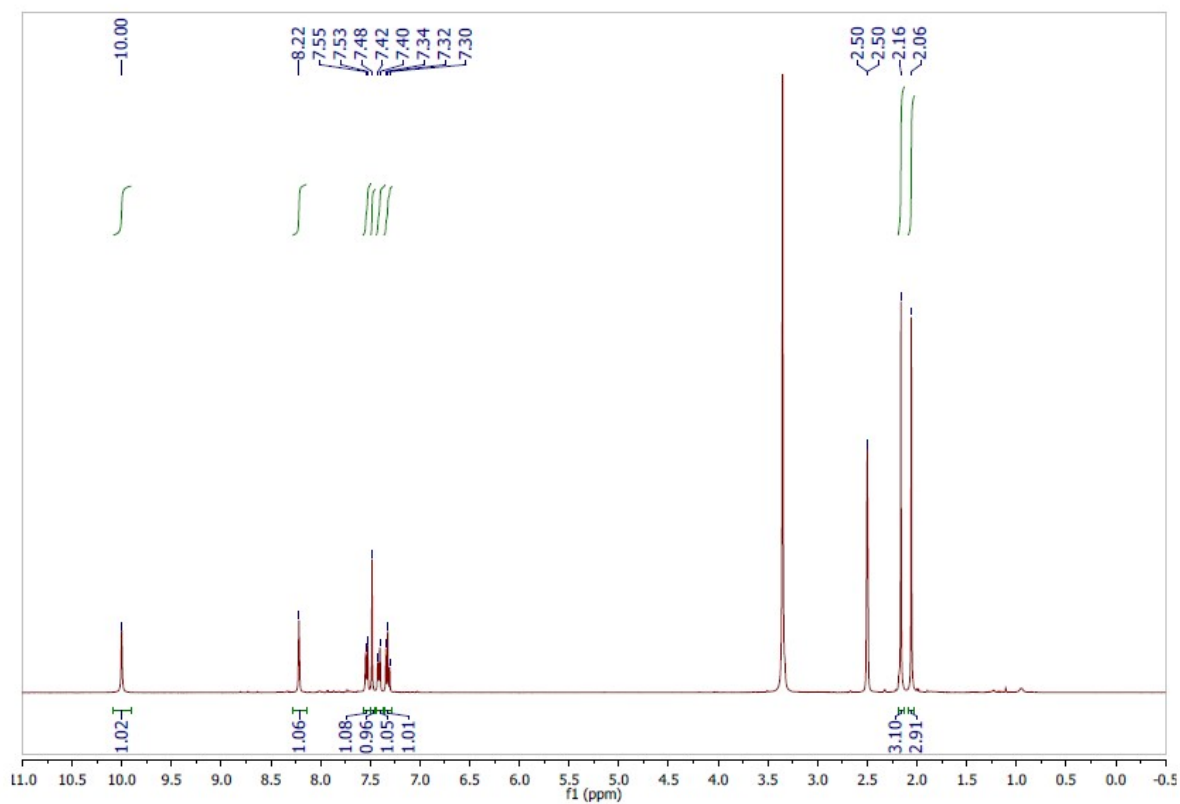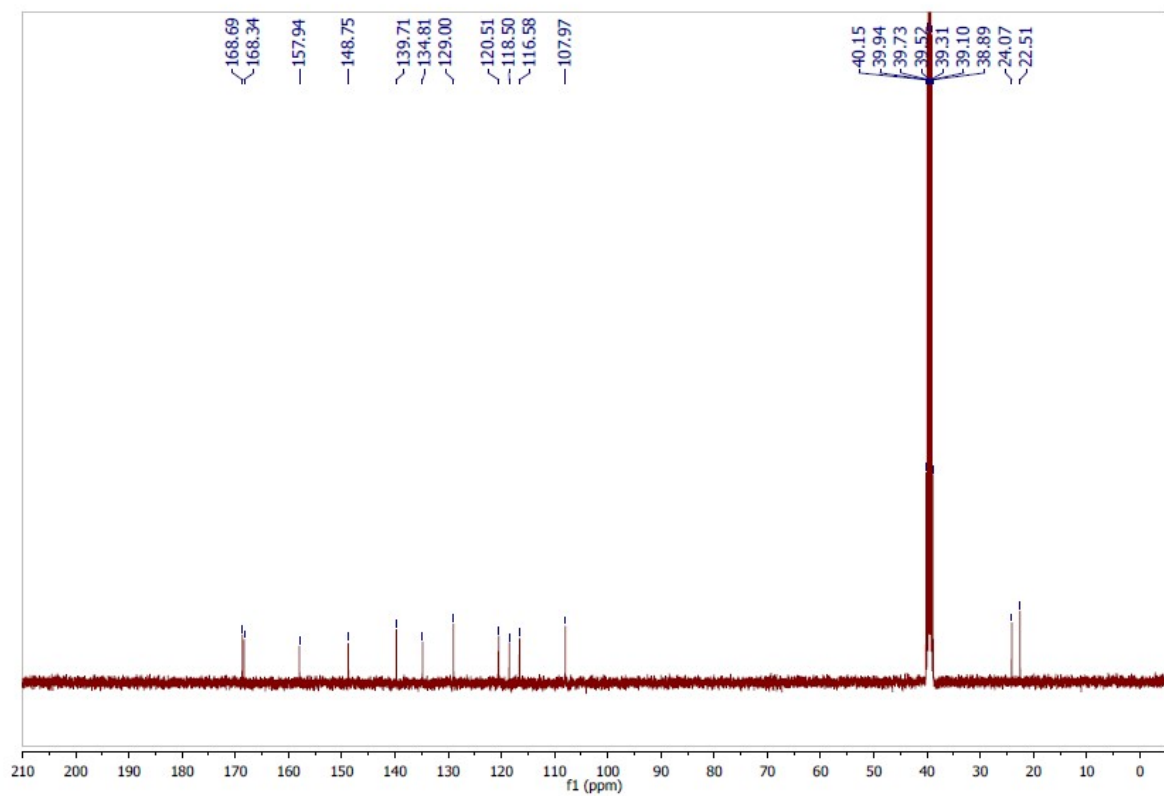

S<sub>2</sub>

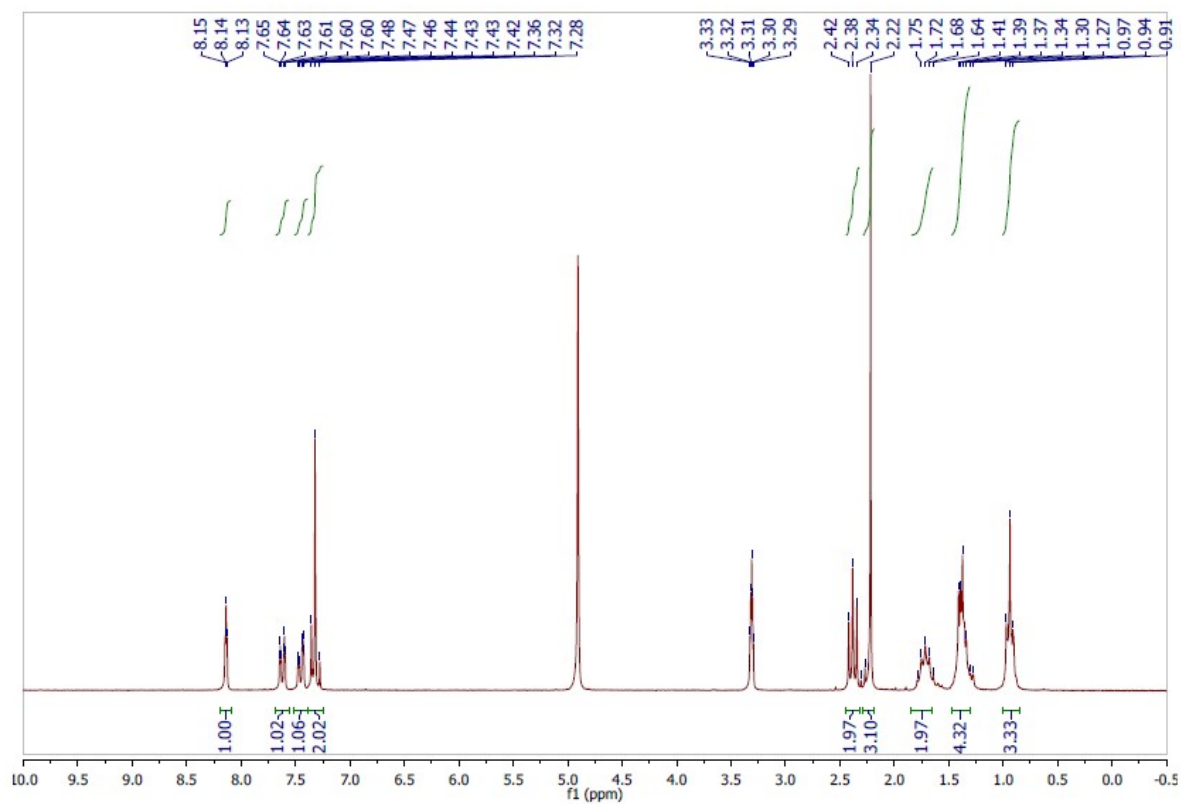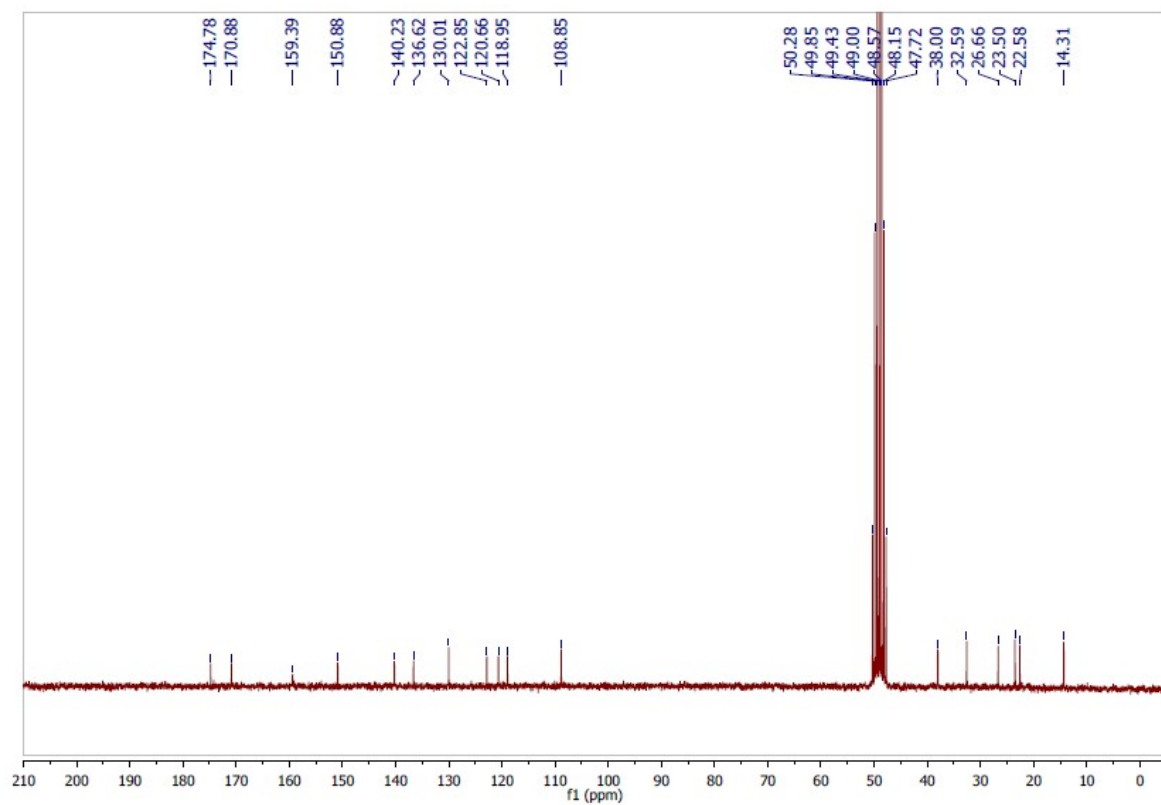

S<sub>4</sub>

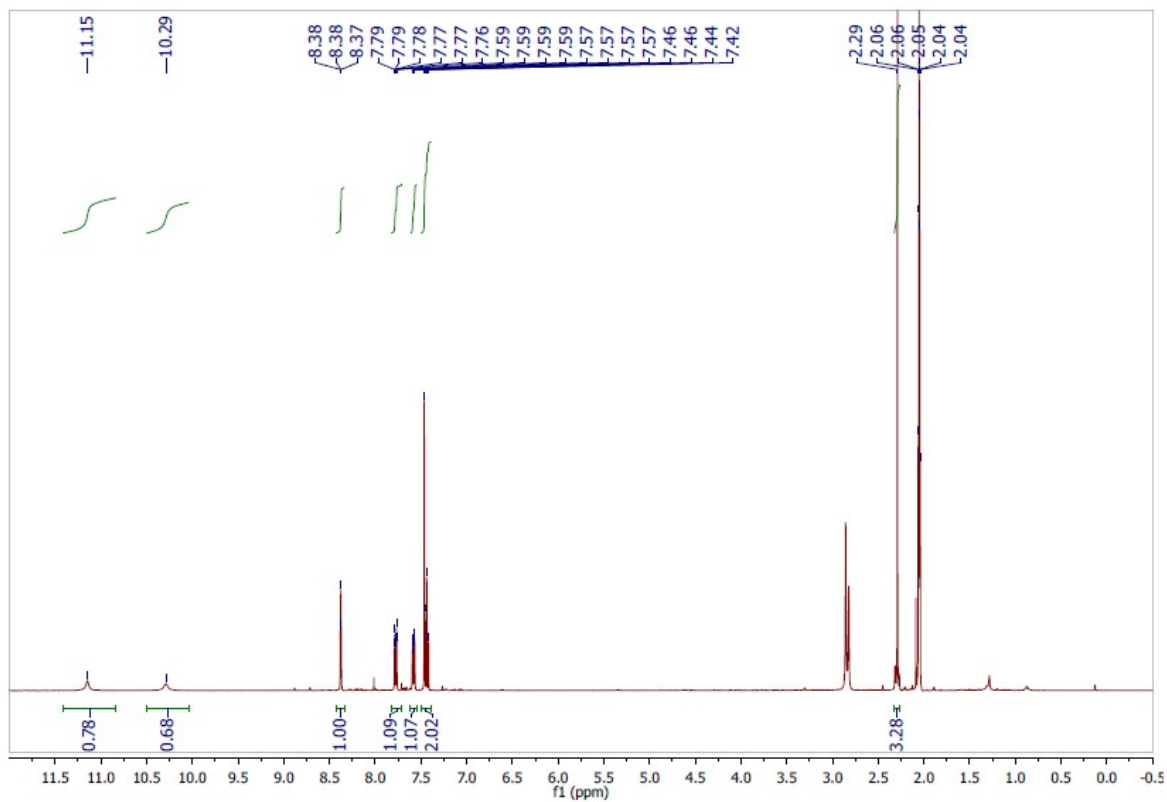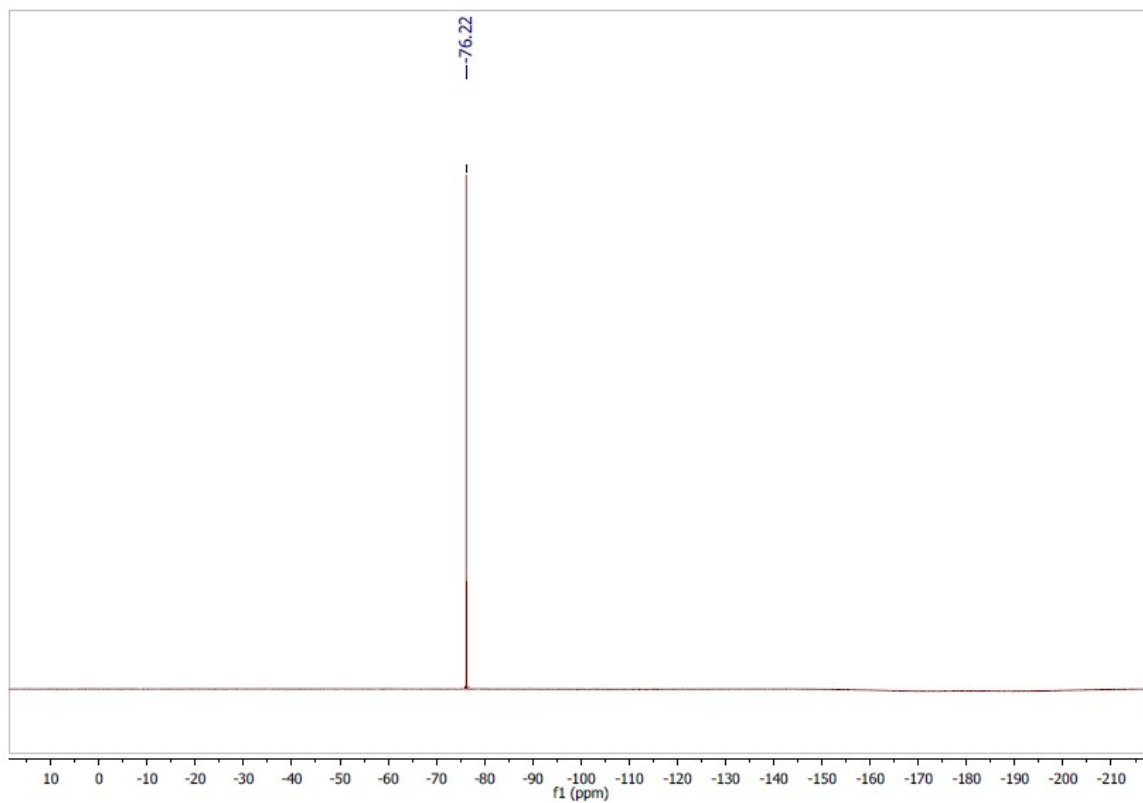

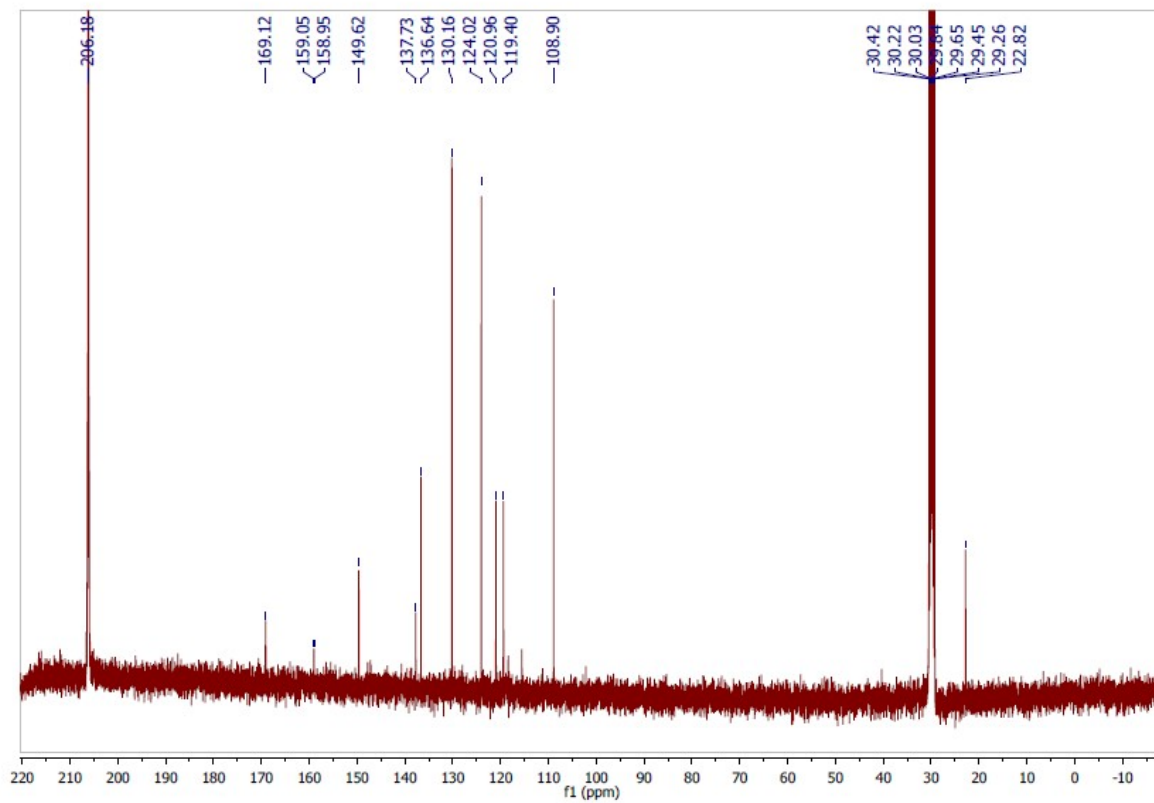

S<sub>9</sub>

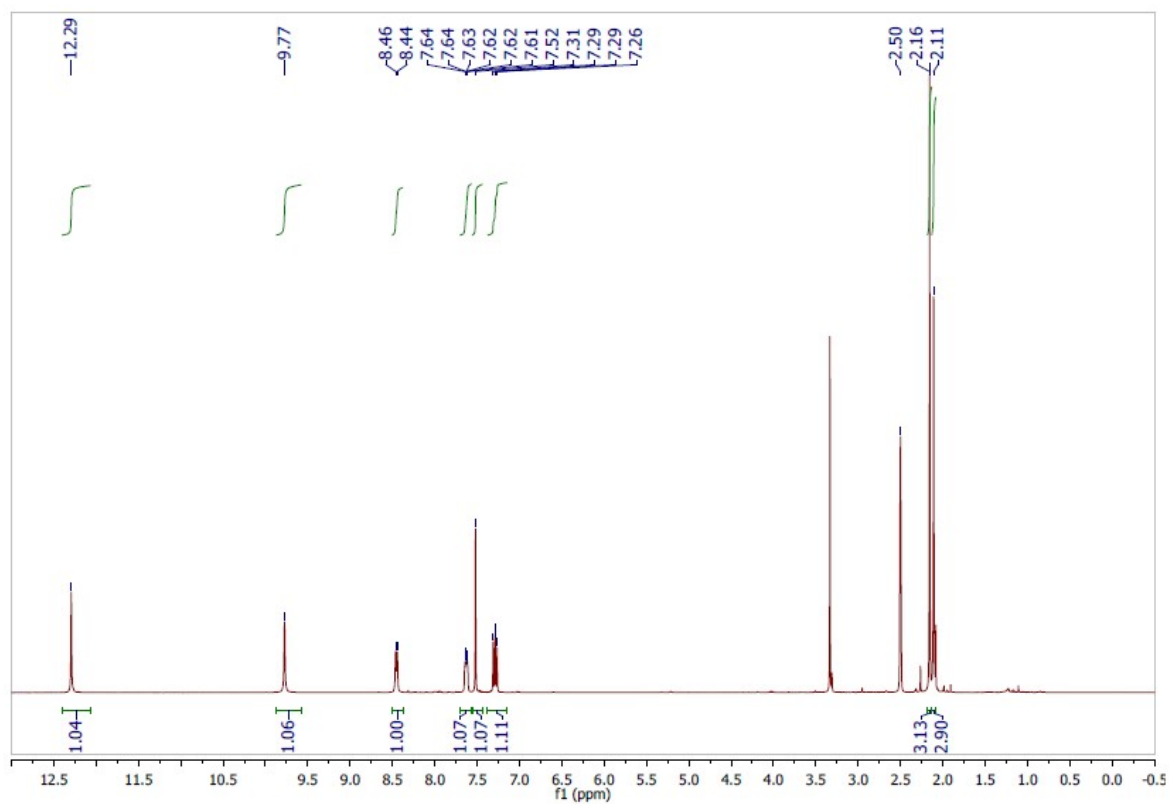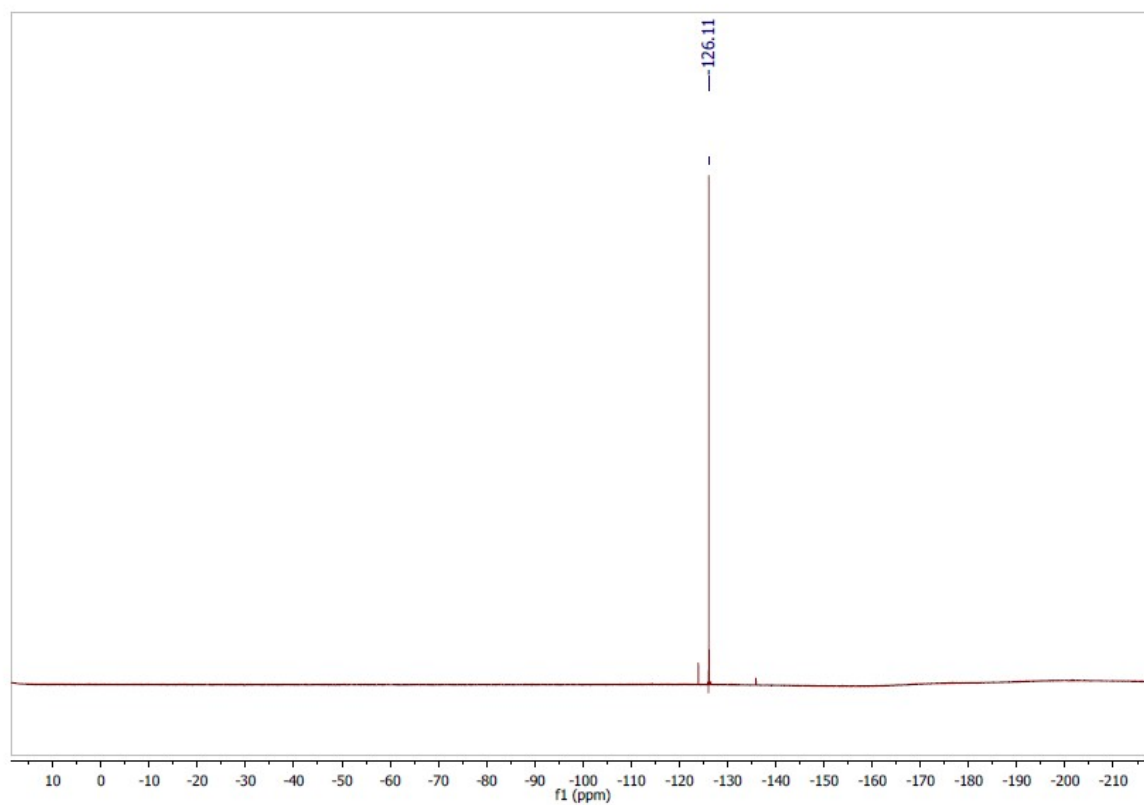

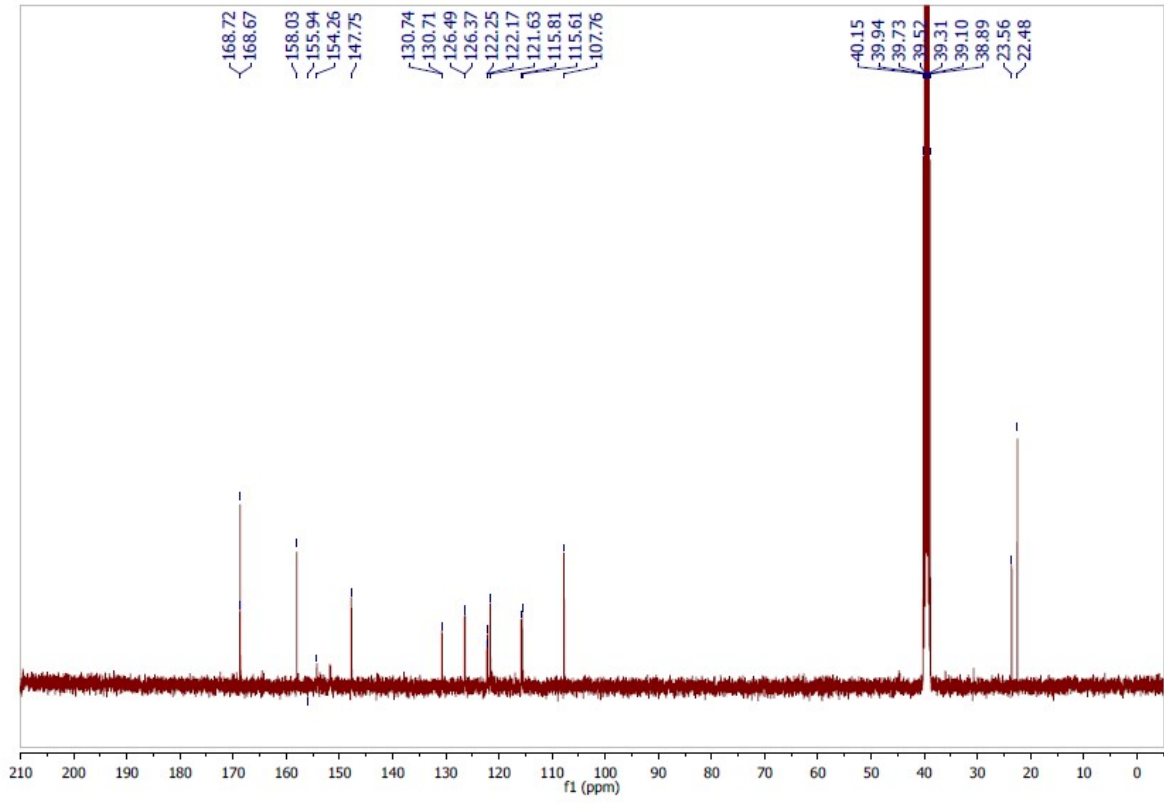

HB<sub>1</sub>

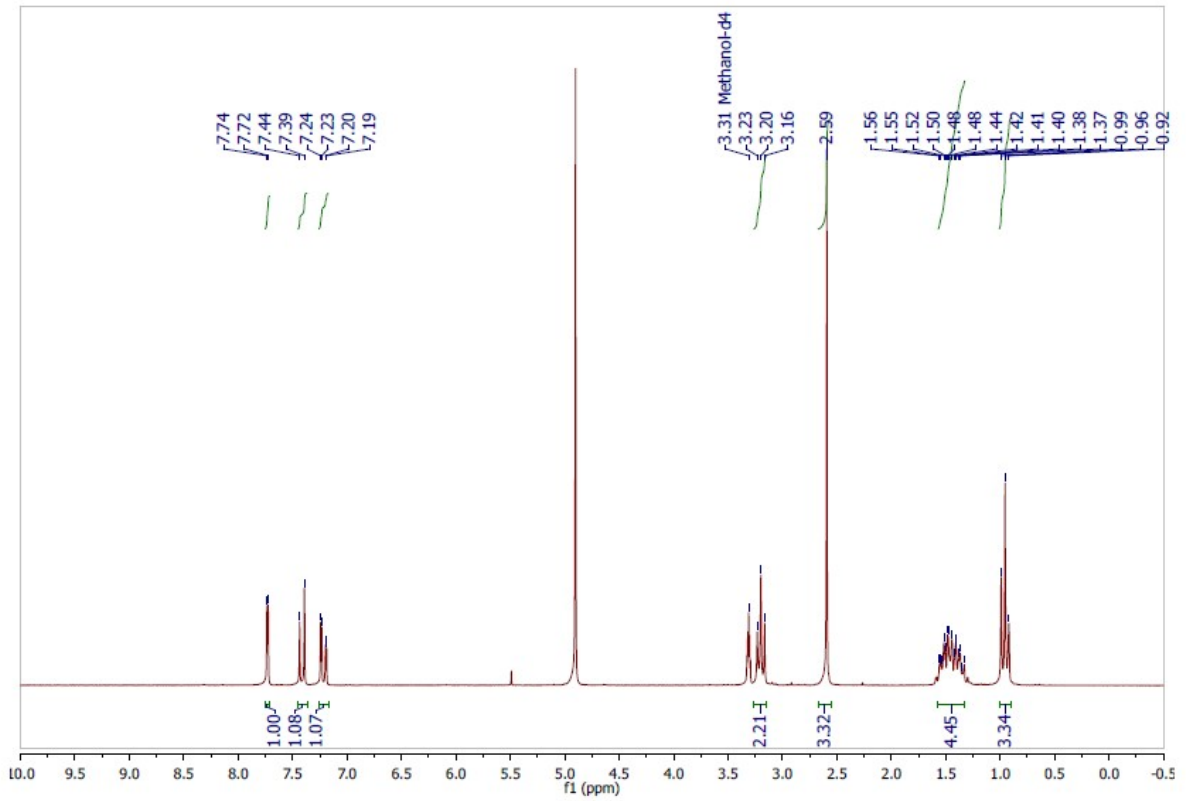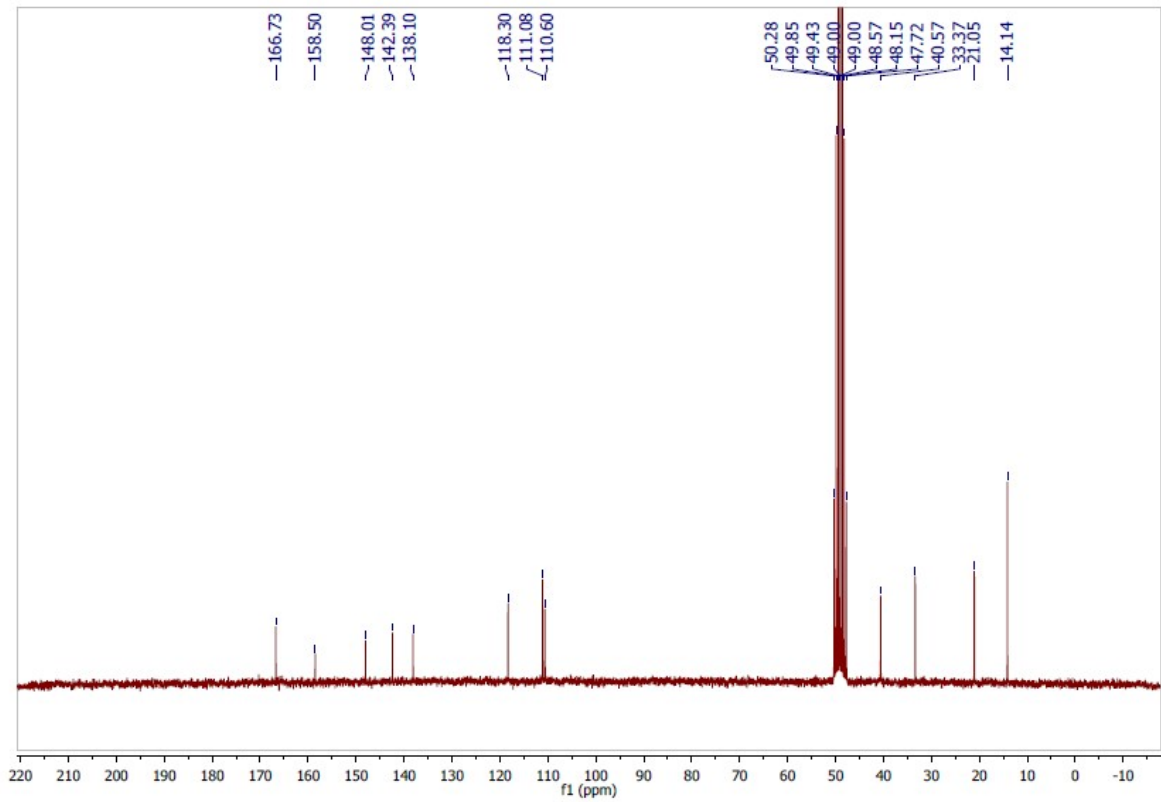

HB<sub>3</sub>

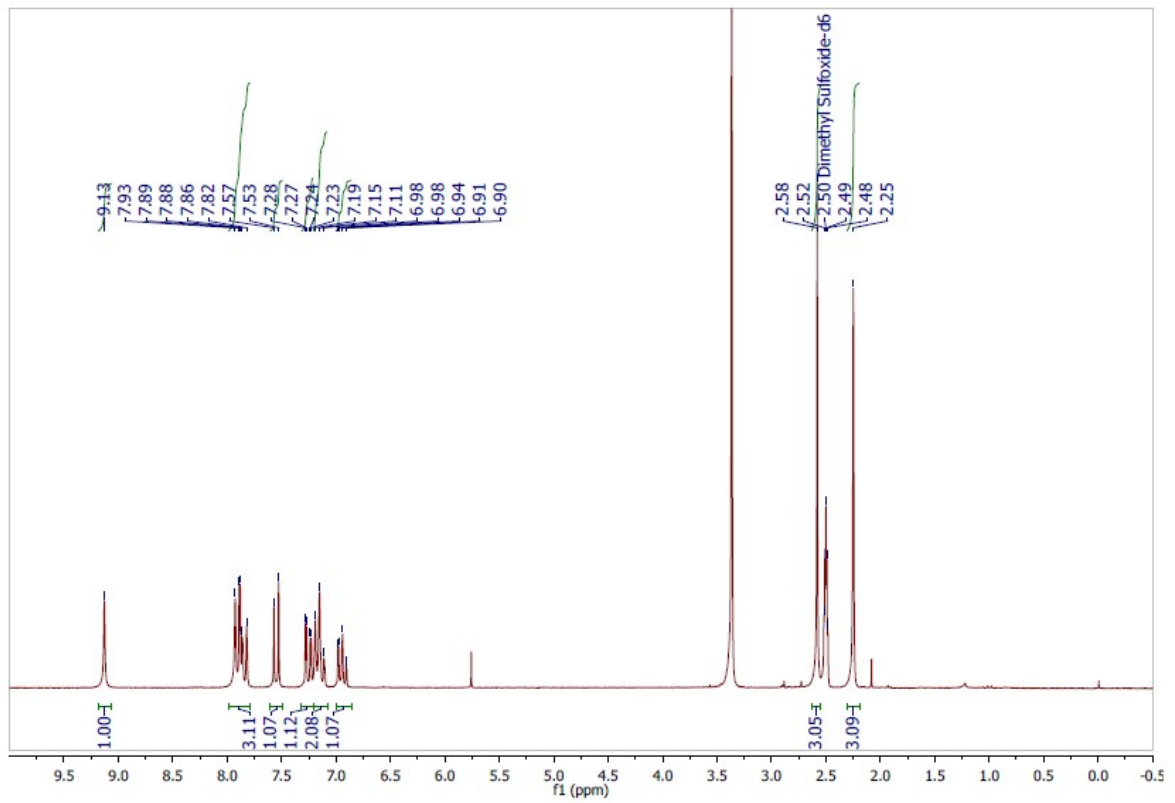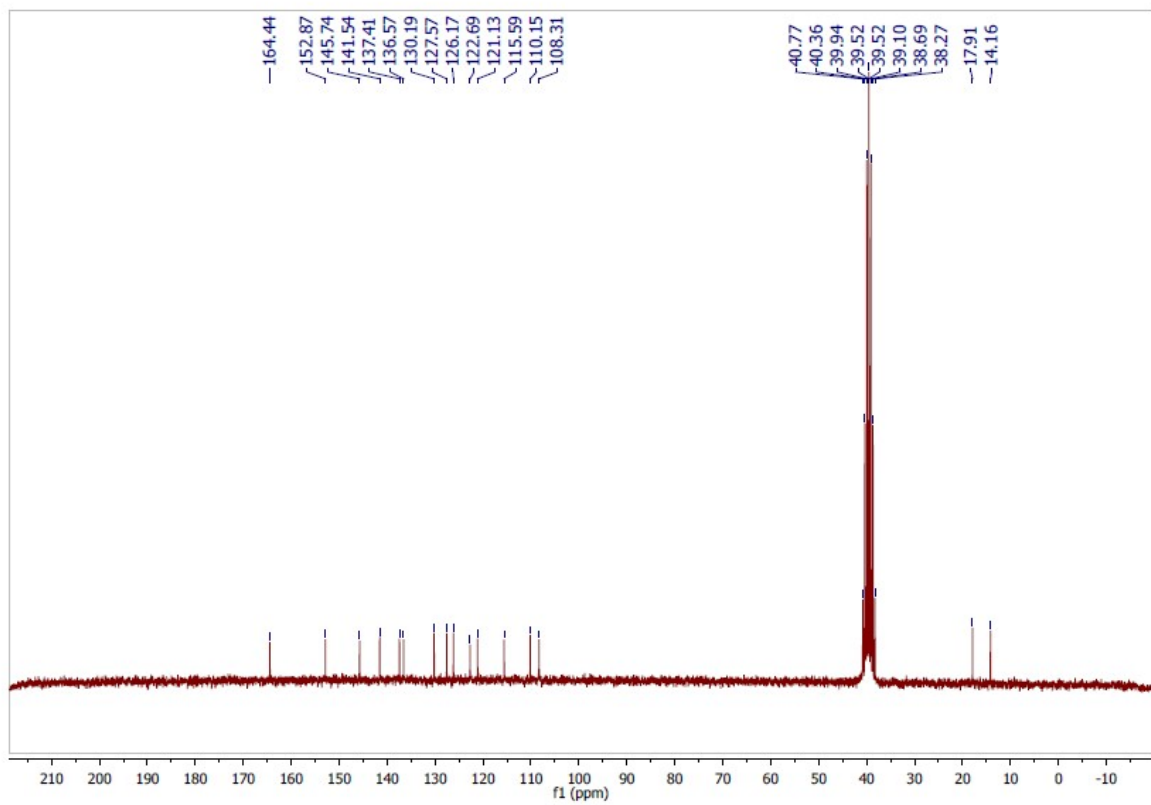



HB<sub>4</sub>

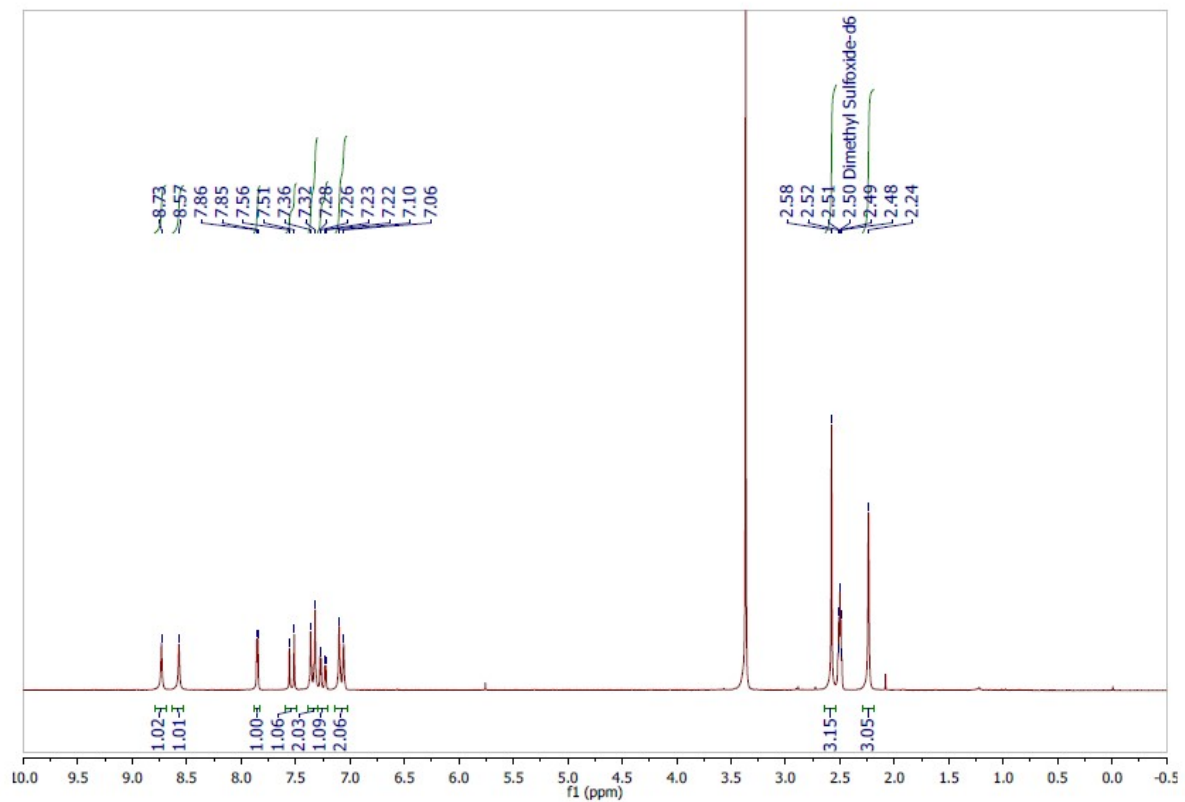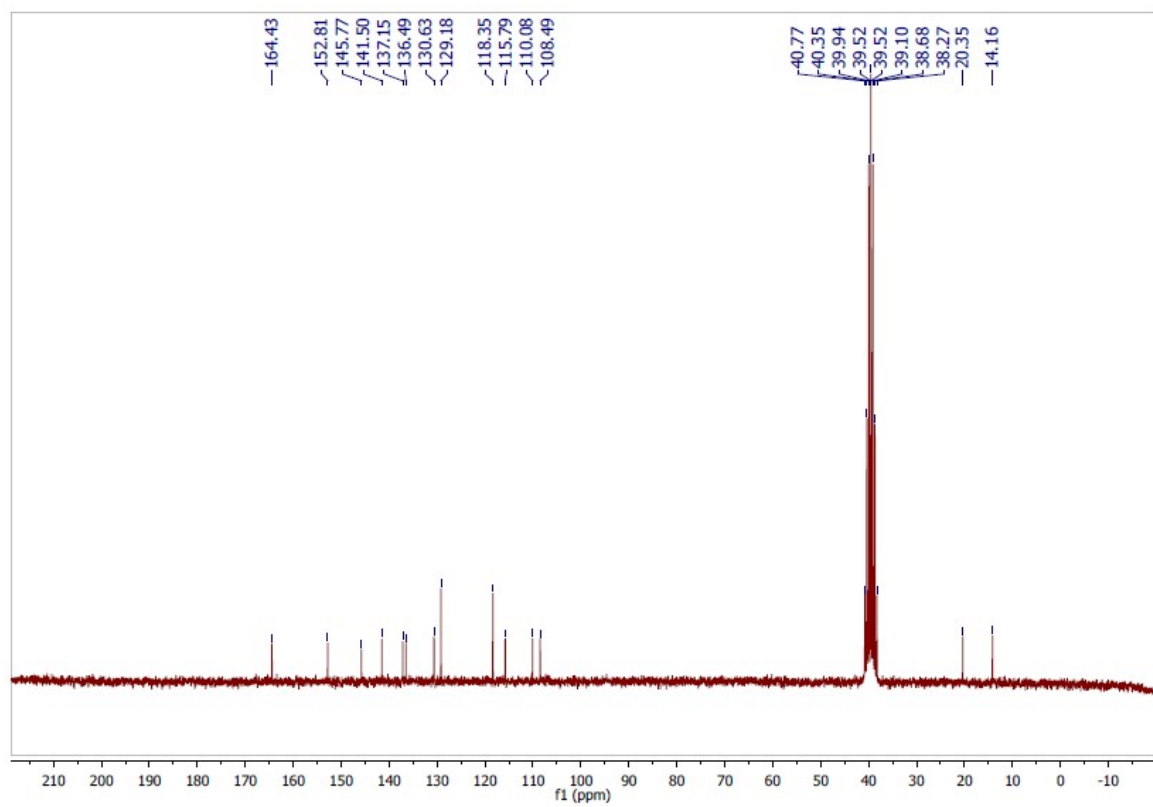

HB<sub>5</sub>

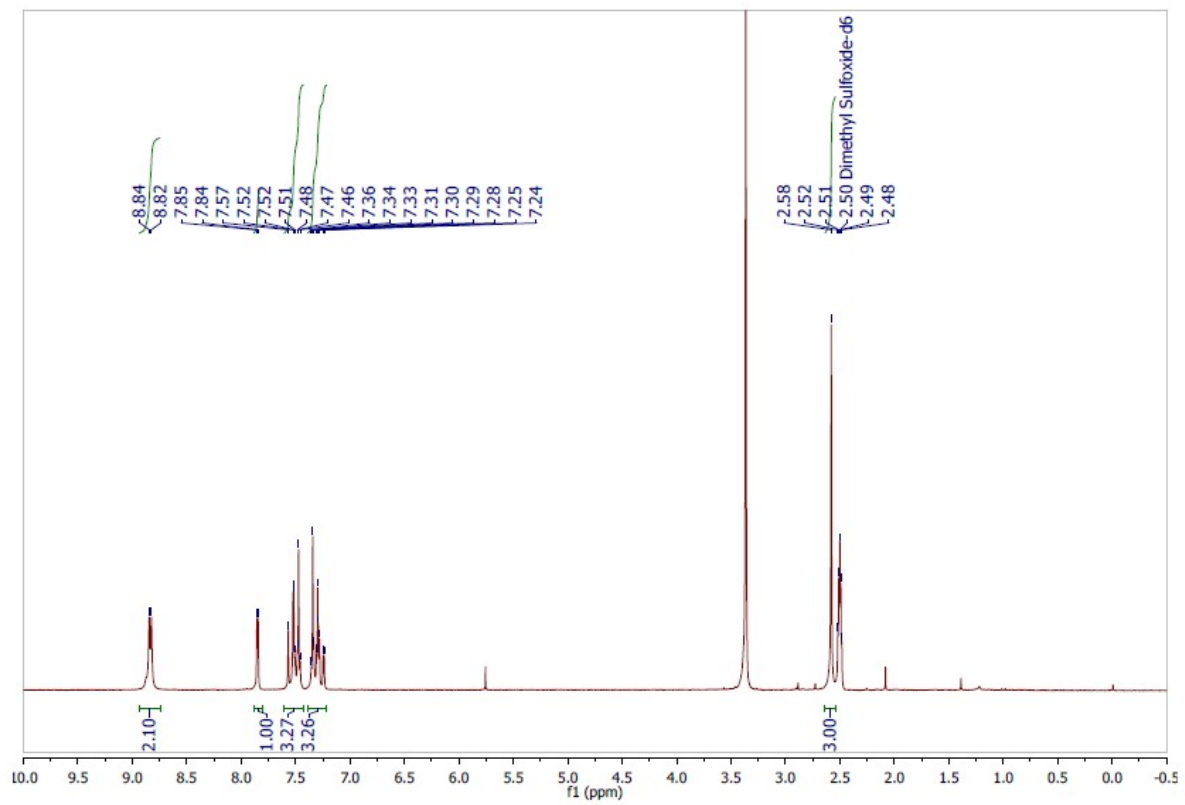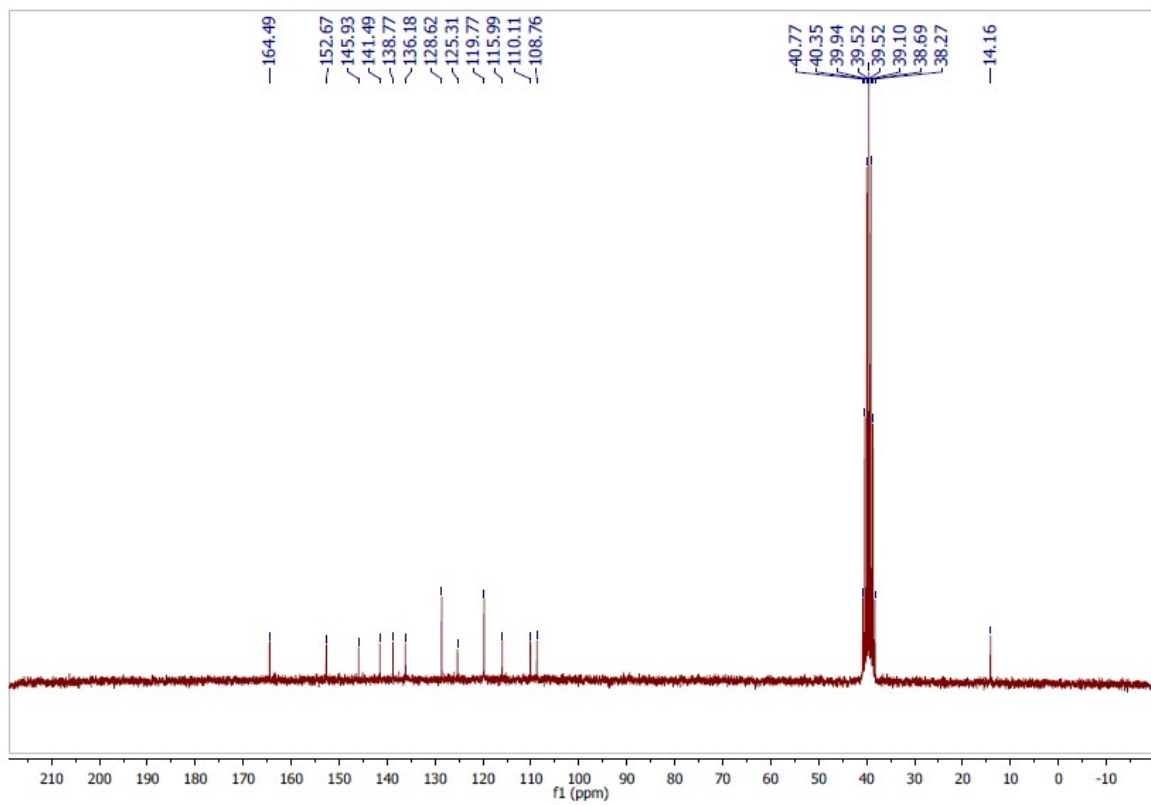

## Triplex breakdown curves

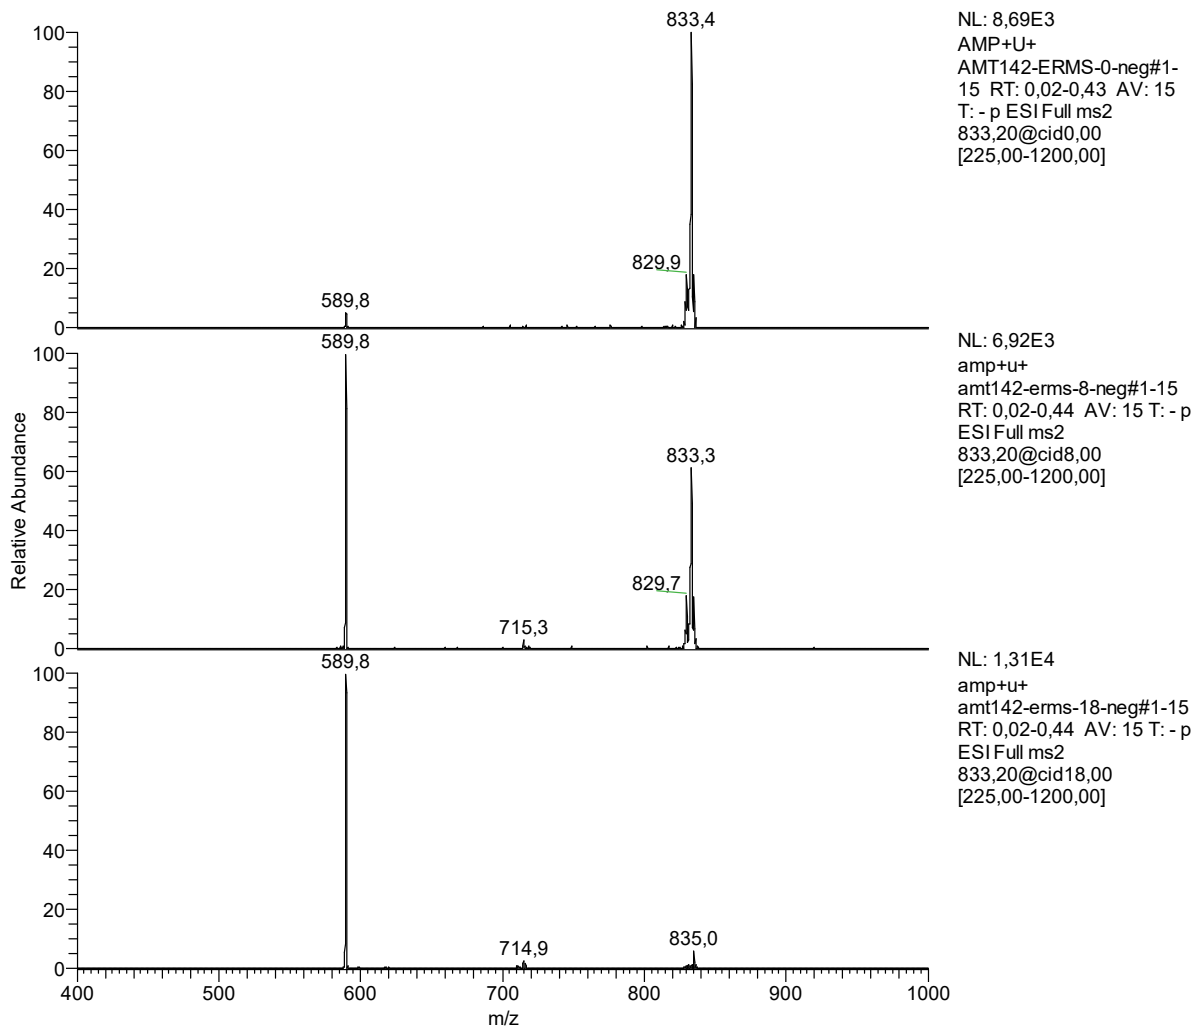

Representative CID of [U+ APO<sub>3</sub><sup>-</sup>+ U] triplet

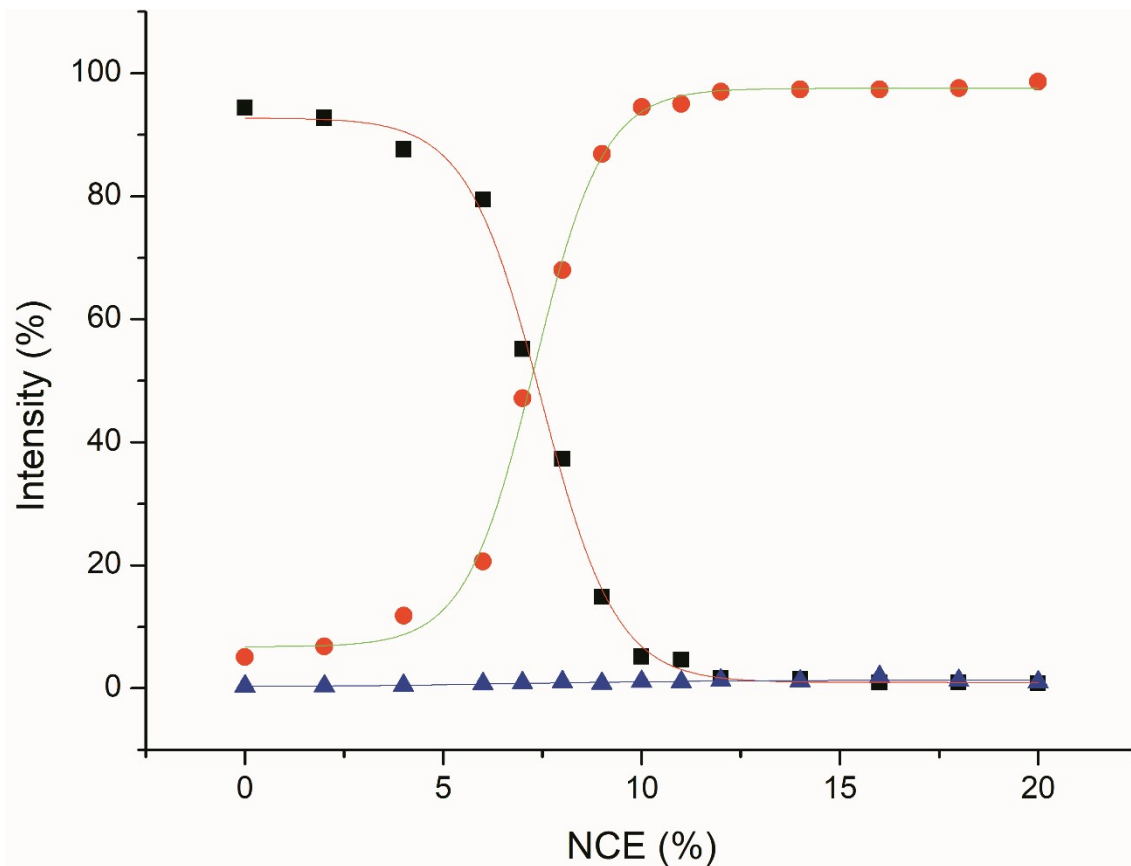

| Model           | Boltzmann                                |          |                |
|-----------------|------------------------------------------|----------|----------------|
| Equation        | $y = A2 + (A1-A2)/(1 + \exp((x-x0)/dx))$ |          |                |
| Reduced Chi-Sqr | 4,27556                                  | 3,36064  | 0,05443        |
| Adj. R-Square   | 0,99721                                  | 0,99778  | 0,66863        |
|                 |                                          | Value    | Standard Error |
| B               | A1                                       | 92,75528 | 1,28446        |
| B               | A2                                       | 0,9702   | 0,87713        |
| B               | x0                                       | 7,47546  | 0,06878        |
| B               | dx                                       | 0,93968  | 0,06094        |
| D               | A1                                       | 6,75512  | 1,13003        |
| D               | A2                                       | 97,57041 | 0,75126        |
| D               | x0                                       | 7,29534  | 0,05812        |
| D               | dx                                       | 0,86776  | 0,05175        |
| F               | A1                                       | 0,26377  | 0,33727        |
| F               | A2                                       | 1,31846  | 0,15361        |
| F               | x0                                       | 6,94872  | 2,18196        |
| F               | dx                                       | 2,45992  | 1,95694        |

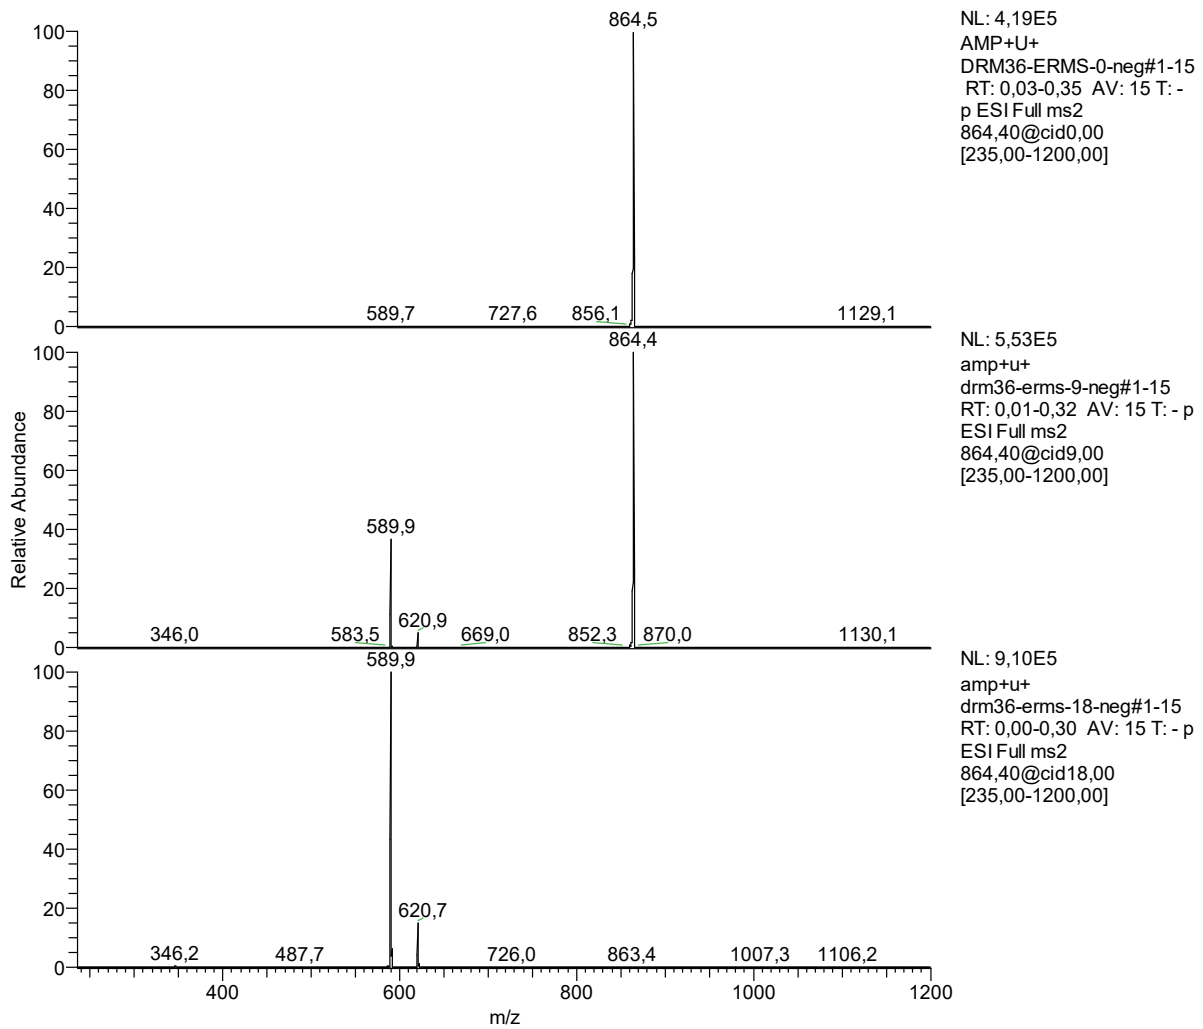

Representative CID of  $[S_1 + APO_3^- + U]$  triplet

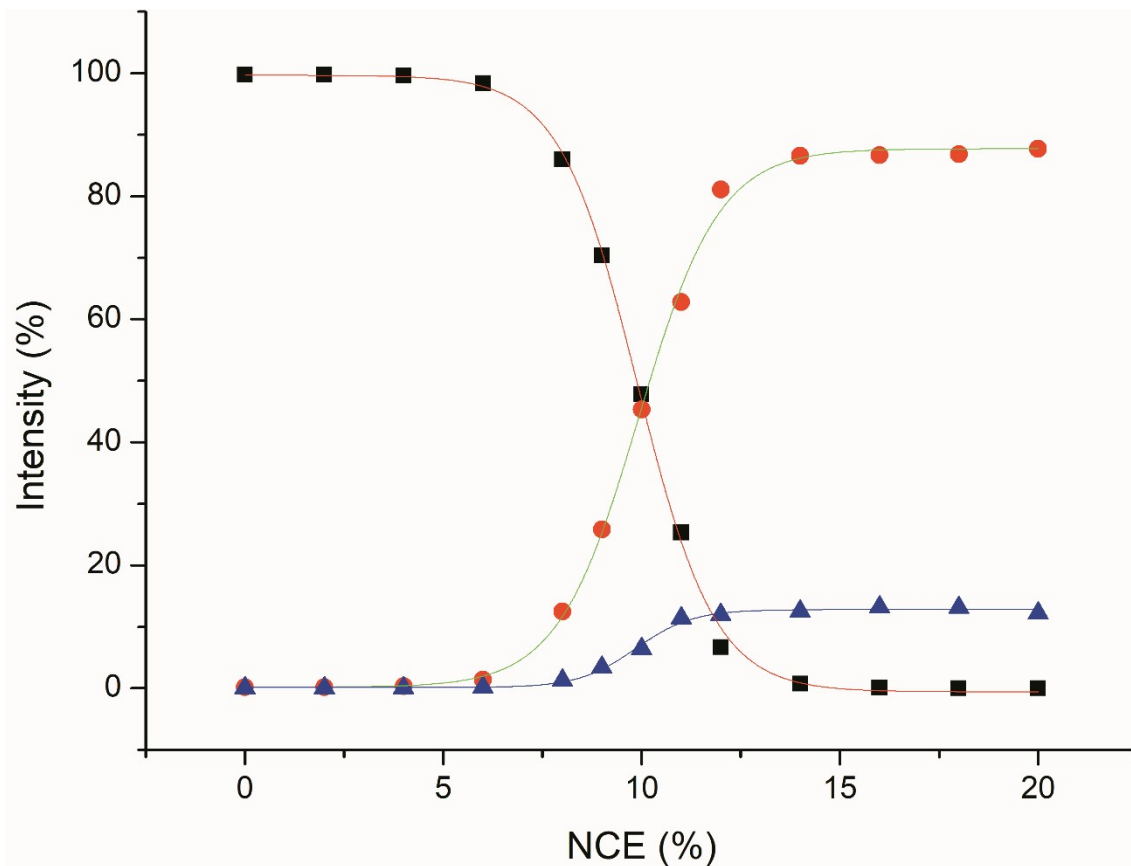

| Model           | Boltzmann                                |          |                |
|-----------------|------------------------------------------|----------|----------------|
| Equation        | $y = A2 + (A1-A2)/(1 + \exp((x-x0)/dx))$ |          |                |
| Reduced Chi-Sqr | 1,73667                                  | 2,26911  | 0,21584        |
| Adj. R-Square   | 0,99913                                  | 0,99849  | 0,99375        |
|                 |                                          | Value    | Standard Error |
| B               | A1                                       | 99,68878 | 0,68521        |
| B               | A2                                       | -0,57177 | 0,67635        |
| B               | x0                                       | 9,89211  | 0,04065        |
| B               | dx                                       | 0,97679  | 0,036          |
| D               | A1                                       | 0,1824   | 0,78928        |
| D               | A2                                       | 87,75405 | 0,78198        |
| D               | x0                                       | 9,92282  | 0,05478        |
| D               | dx                                       | 1,01607  | 0,04887        |
| F               | A1                                       | 0,13577  | 0,22839        |
| F               | A2                                       | 12,82165 | 0,22361        |
| F               | x0                                       | 9,85412  | 0,09132        |
| F               | dx                                       | 0,71913  | 0,07836        |

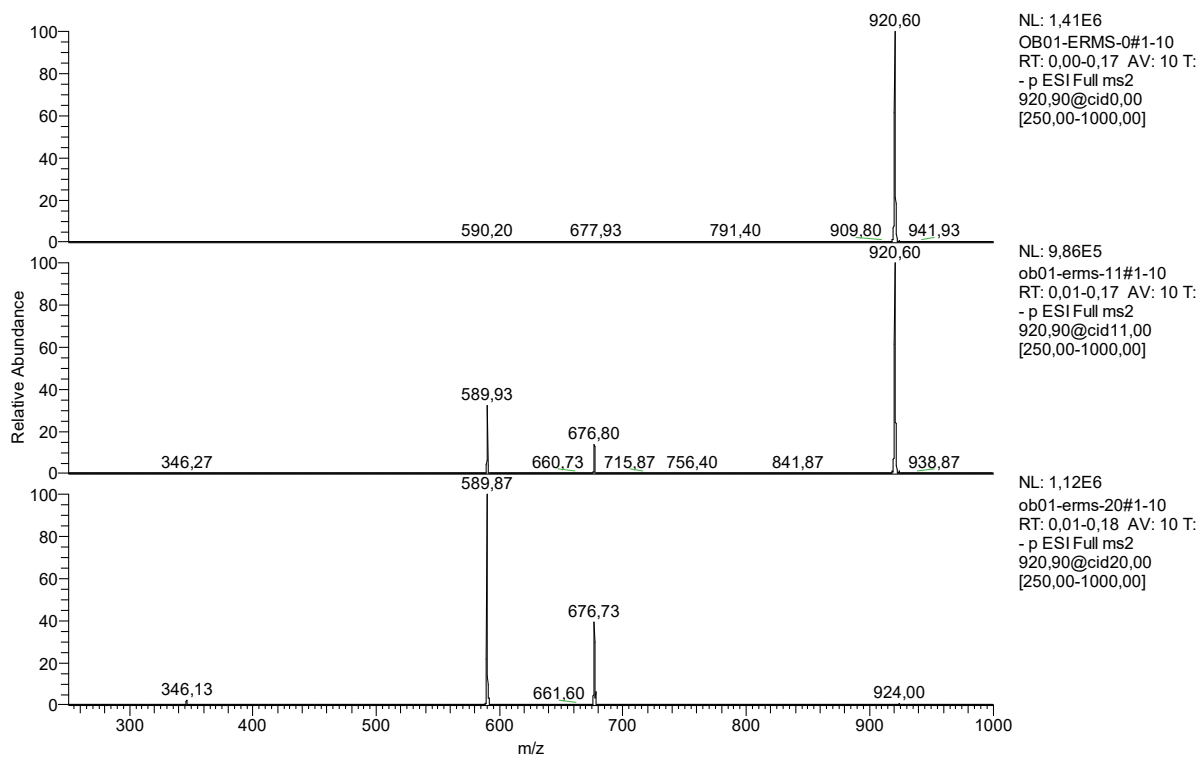

Representative CID of [S2 + APO3-+ U] triplet

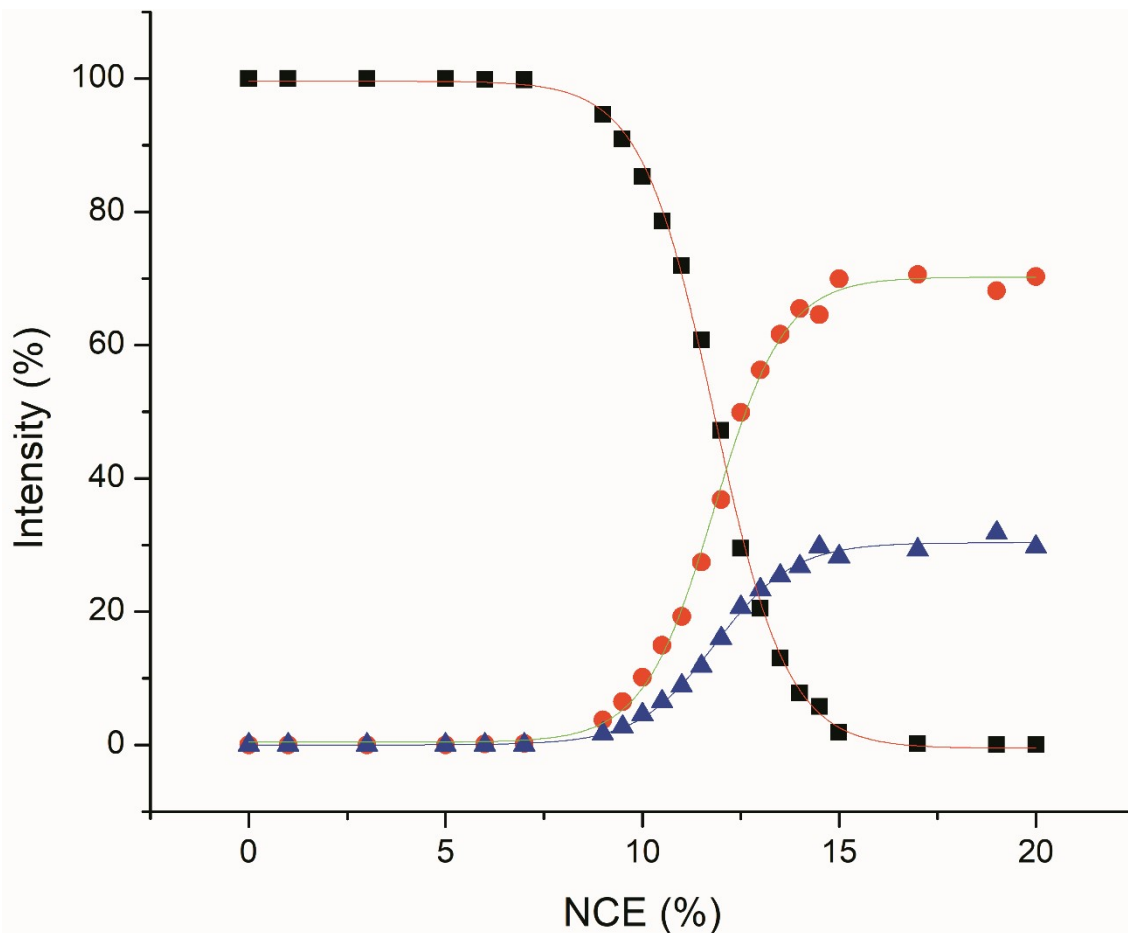

| Model           | Boltzmann                                |          |                |
|-----------------|------------------------------------------|----------|----------------|
| Equation        | $y = A2 + (A1-A2)/(1 + \exp((x-x0)/dx))$ |          |                |
| Reduced Chi-Sqr | 1,91489                                  | 1,91096  | 0,43801        |
| Adj. R-Square   | 0,99891                                  | 0,9978   | 0,99722        |
|                 |                                          | Value    | Standard Error |
| B               | A1                                       | 99,61841 | 0,54178        |
| B               | A2                                       | -0,52863 | 0,6928         |
| B               | x0                                       | 11,82777 | 0,03173        |
| B               | dx                                       | 0,92434  | 0,02676        |
| C               | A1                                       | 0,38641  | 0,53784        |
| C               | A2                                       | 70,1979  | 0,68255        |
| C               | x0                                       | 11,81867 | 0,04433        |
| C               | dx                                       | 0,8966   | 0,03744        |
| D               | A1                                       | -0,00129 | 0,2629         |
| D               | A2                                       | 30,35893 | 0,34249        |
| D               | x0                                       | 11,85458 | 0,05314        |
| D               | dx                                       | 0,99145  | 0,04471        |



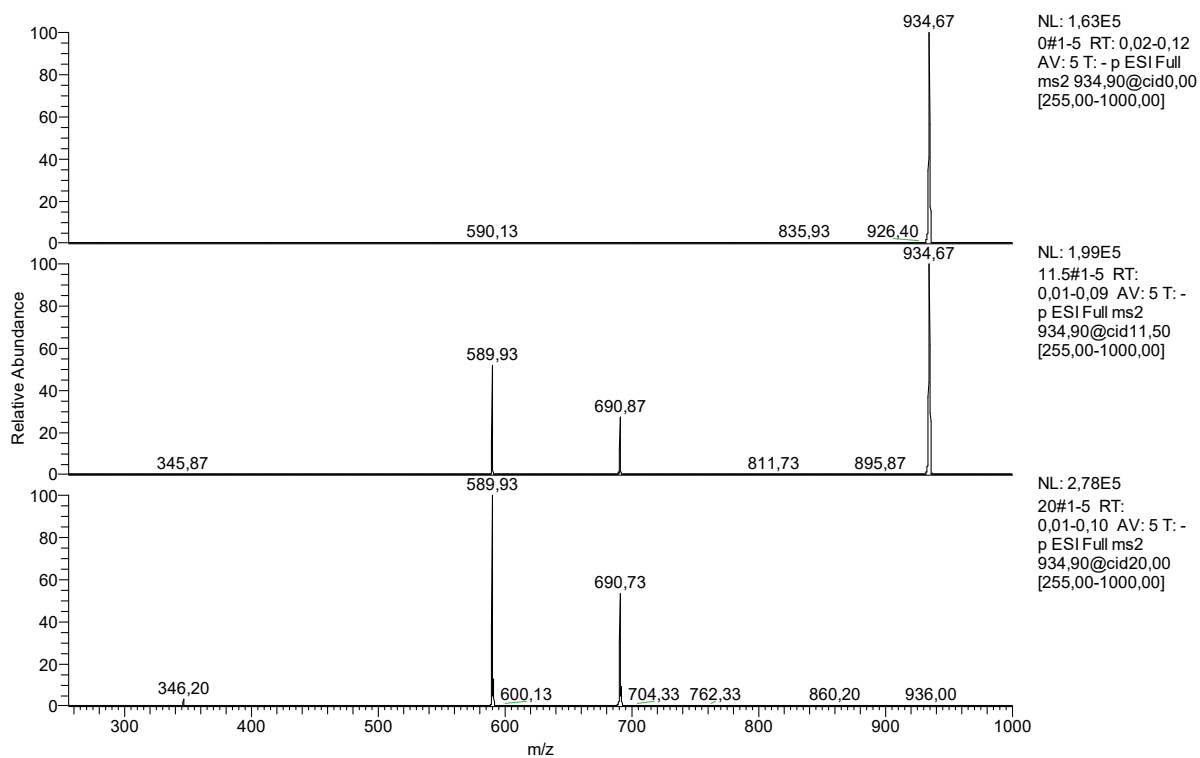

Representative CID of [S3 + APO3-+ U] triplet

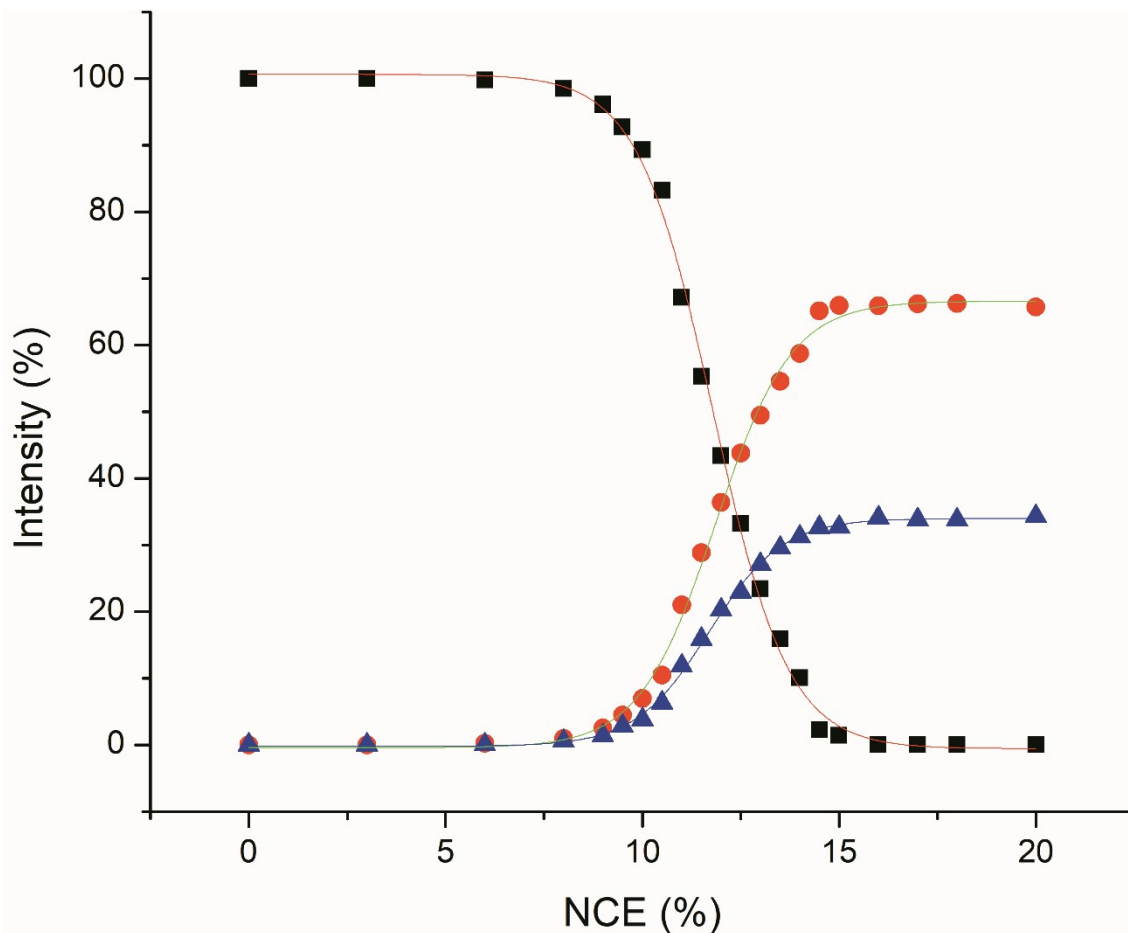

| Model           | Boltzmann                                |           |                |
|-----------------|------------------------------------------|-----------|----------------|
| Equation        | $y = A2 + (A1-A2)/(1 + \exp((x-x0)/dx))$ |           |                |
| Reduced Chi-Sqr | 3,15301                                  | 1,93038   | 0,30175        |
| Adj. R-Square   | 0,9982                                   | 0,99749   | 0,99851        |
|                 |                                          | Value     | Standard Error |
| B               | A1                                       | 100,64843 | 0,8648         |
| B               | A2                                       | -0,58688  | 0,83186        |
| B               | x0                                       | 11,79567  | 0,04205        |
| B               | dx                                       | 0,95347   | 0,03621        |
| C               | A1                                       | -0,42988  | 0,67428        |
| C               | A2                                       | 66,6039   | 0,65923        |
| C               | x0                                       | 11,85217  | 0,05011        |
| C               | dx                                       | 0,96232   | 0,04317        |
| D               | A1                                       | -0,20739  | 0,26885        |
| D               | A2                                       | 33,98733  | 0,25059        |
| D               | x0                                       | 11,68793  | 0,03774        |
| D               | dx                                       | 0,93189   | 0,03249        |

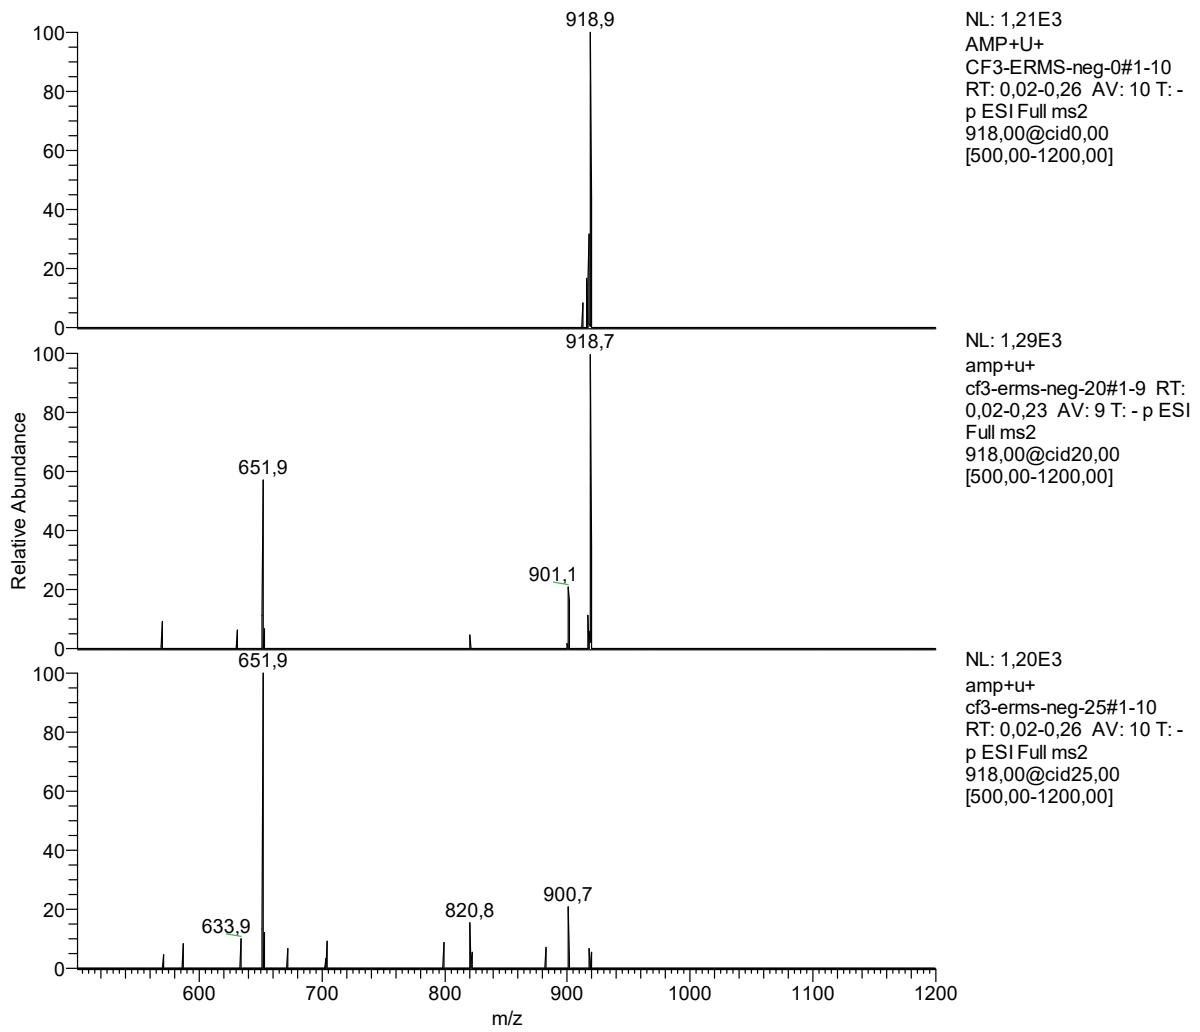

Representative CID of [S4 + APO3-+ U] triplet

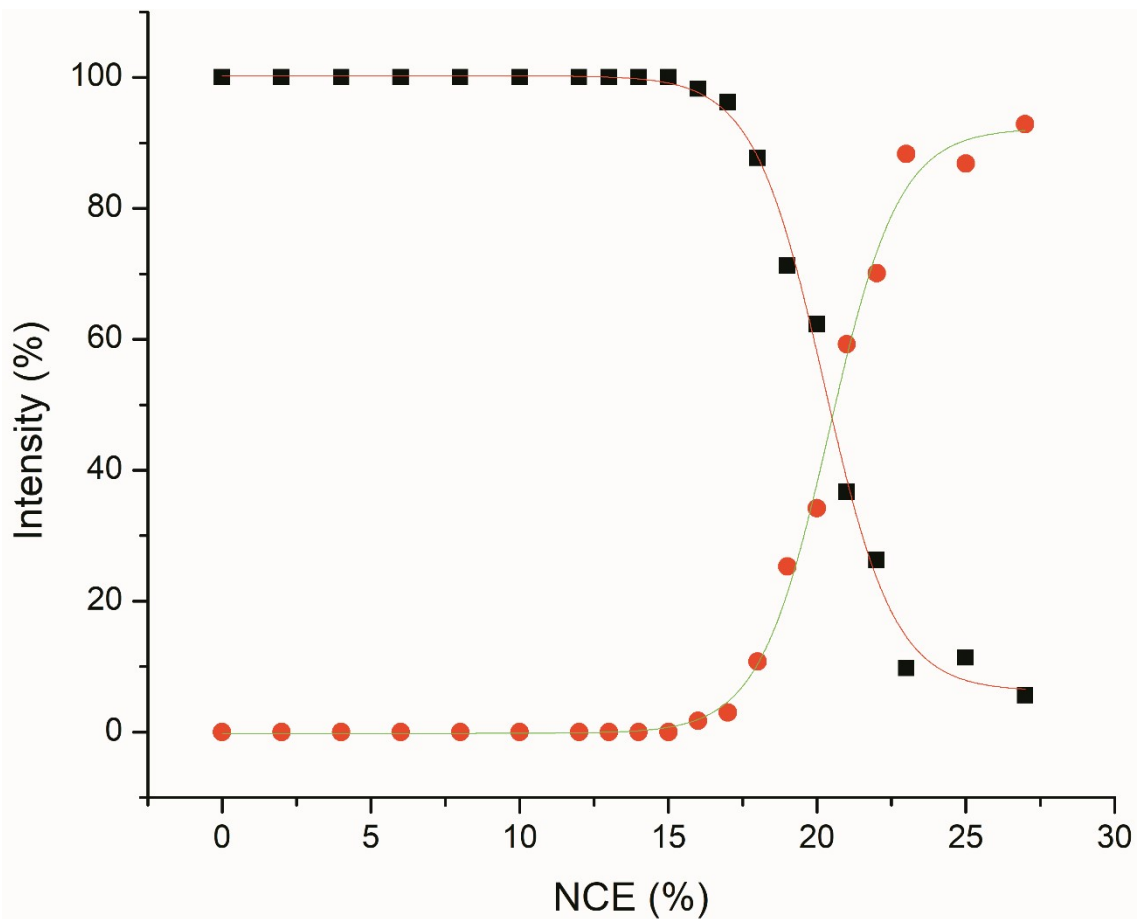

| Model           |    | Boltzmann                                |                |
|-----------------|----|------------------------------------------|----------------|
| Equation        |    | $y = A2 + (A1-A2)/(1 + \exp((x-x0)/dx))$ |                |
| Reduced Chi-Sqr |    | 5,68181                                  | 5,62034        |
| Adj. R-Square   |    | 0,9956                                   | 0,99539        |
|                 |    | Value                                    | Standard Error |
| triplex         | A1 | 100,25678                                | 0,74624        |
| triplex         | A2 | 6,26368                                  | 1,75805        |
| triplex         | x0 | 20,23381                                 | 0,09427        |
| triplex         | dx | 1,18522                                  | 0,07861        |
| m/z             | A1 | -0,18417                                 | 0,73526        |
| m/z             | A2 | 92,23059                                 | 1,78425        |
| m/z             | x0 | 20,40608                                 | 0,09547        |
| m/z             | dx | 1,17667                                  | 0,07951        |

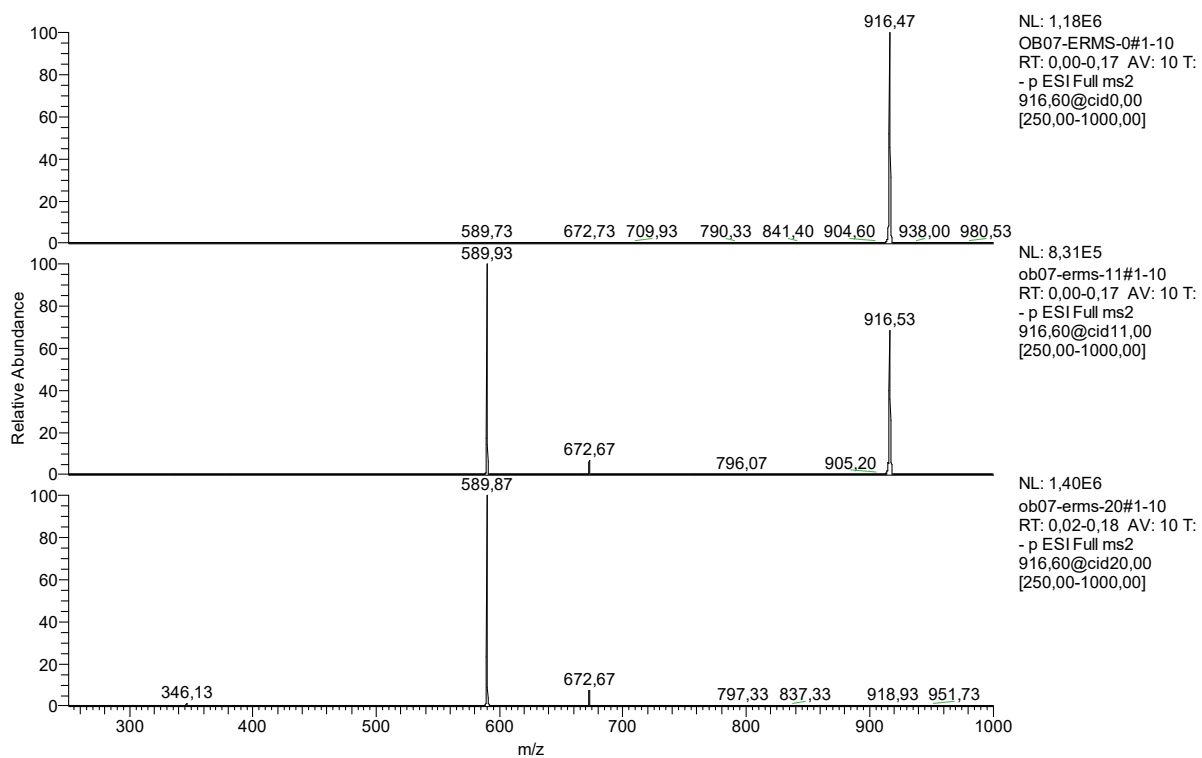

Representative CID of [S5 + APO3-+ U] triplet

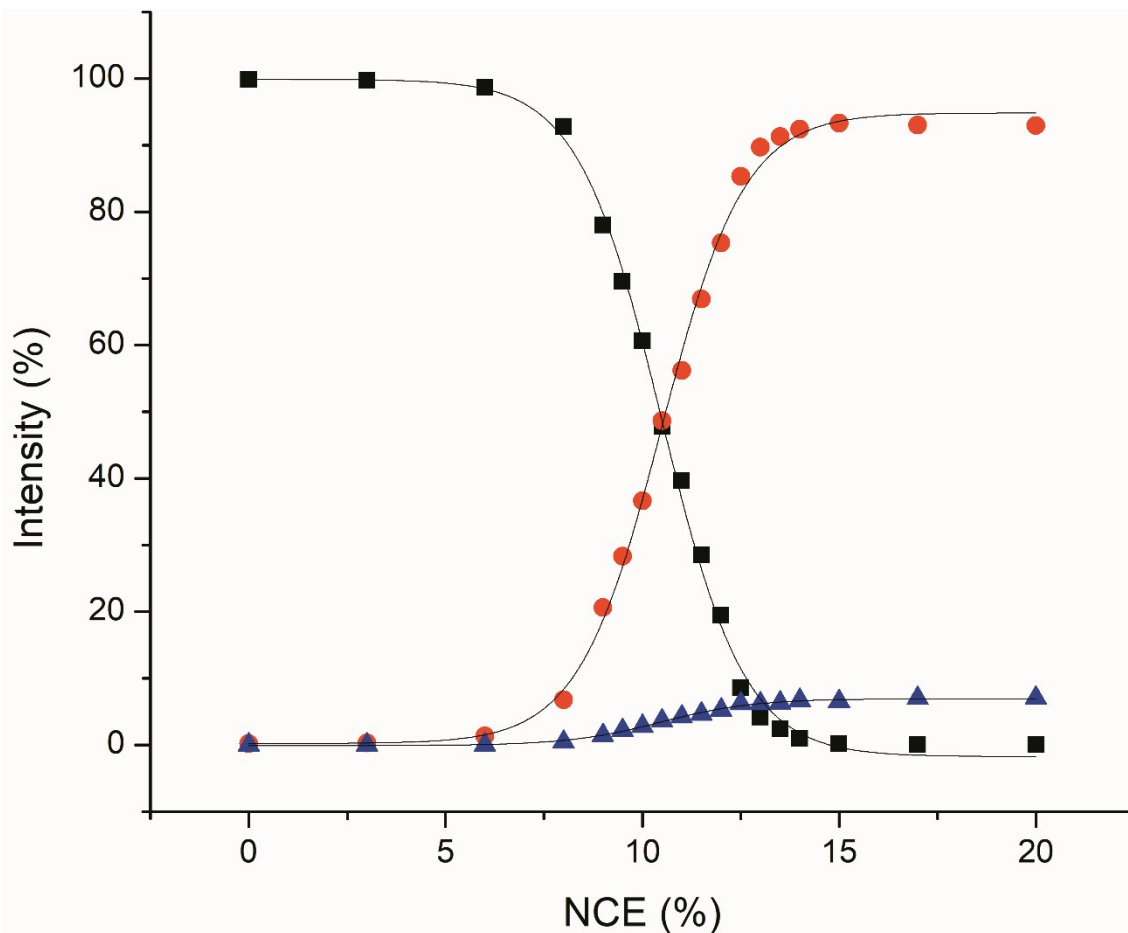

| Model           | Boltzmann                                |          |                |
|-----------------|------------------------------------------|----------|----------------|
| Equation        | $y = A2 + (A1-A2)/(1 + \exp((x-x0)/dx))$ |          |                |
| Reduced Chi-Sqr | 3,44159                                  | 3,23755  | 0,02924        |
| Adj. R-Square   | 0,99781                                  | 0,99763  | 0,99589        |
|                 |                                          | Value    | Standard Error |
| B               | A1                                       | 99,89932 | 1,0731         |
| B               | A2                                       | -1,76869 | 0,98024        |
| B               | x0                                       | 10,48388 | 0,05025        |
| B               | dx                                       | 1,05948  | 0,04475        |
| C               | A1                                       | 0,19679  | 1,03848        |
| C               | A2                                       | 94,86484 | 0,94709        |
| C               | x0                                       | 10,48567 | 0,05199        |
| C               | dx                                       | 1,05186  | 0,04627        |
| D               | A1                                       | -0,09662 | 0,10221        |
| D               | A2                                       | 6,92298  | 0,09594        |
| D               | x0                                       | 10,47094 | 0,07418        |
| D               | dx                                       | 1,17709  | 0,06667        |

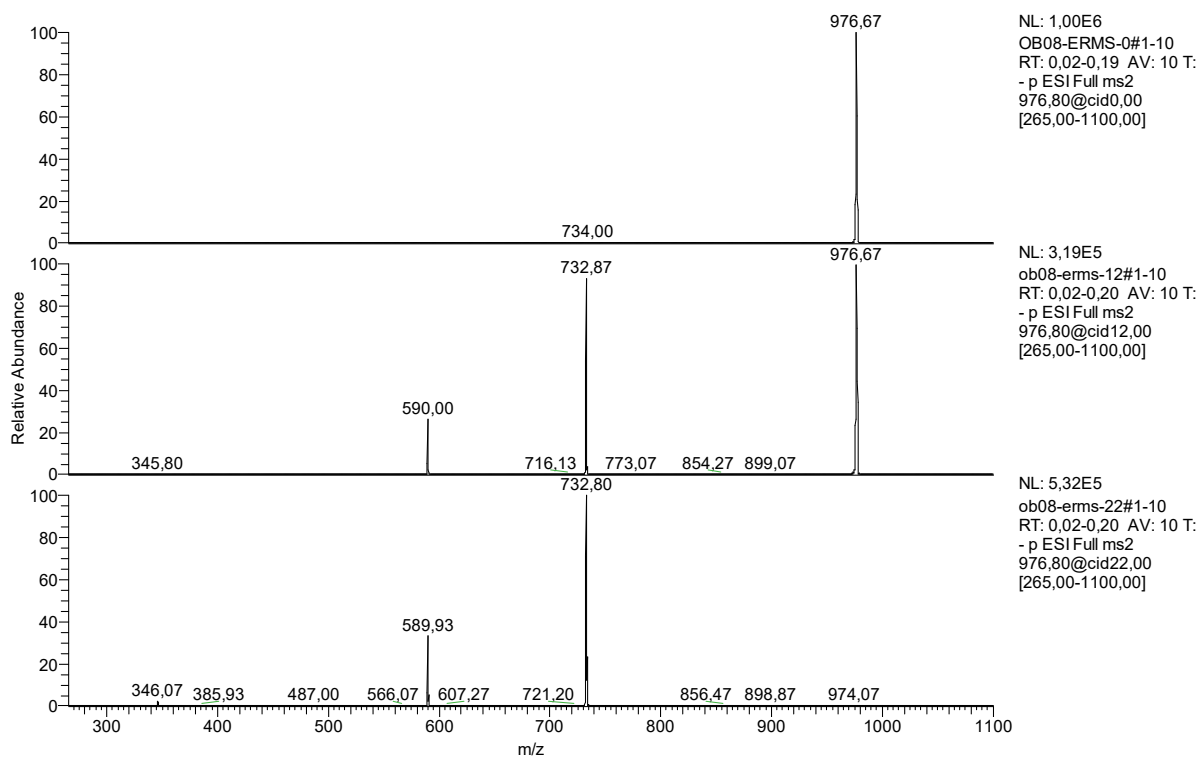

Representative CID of [S6 + APO3-+ U] triplet.

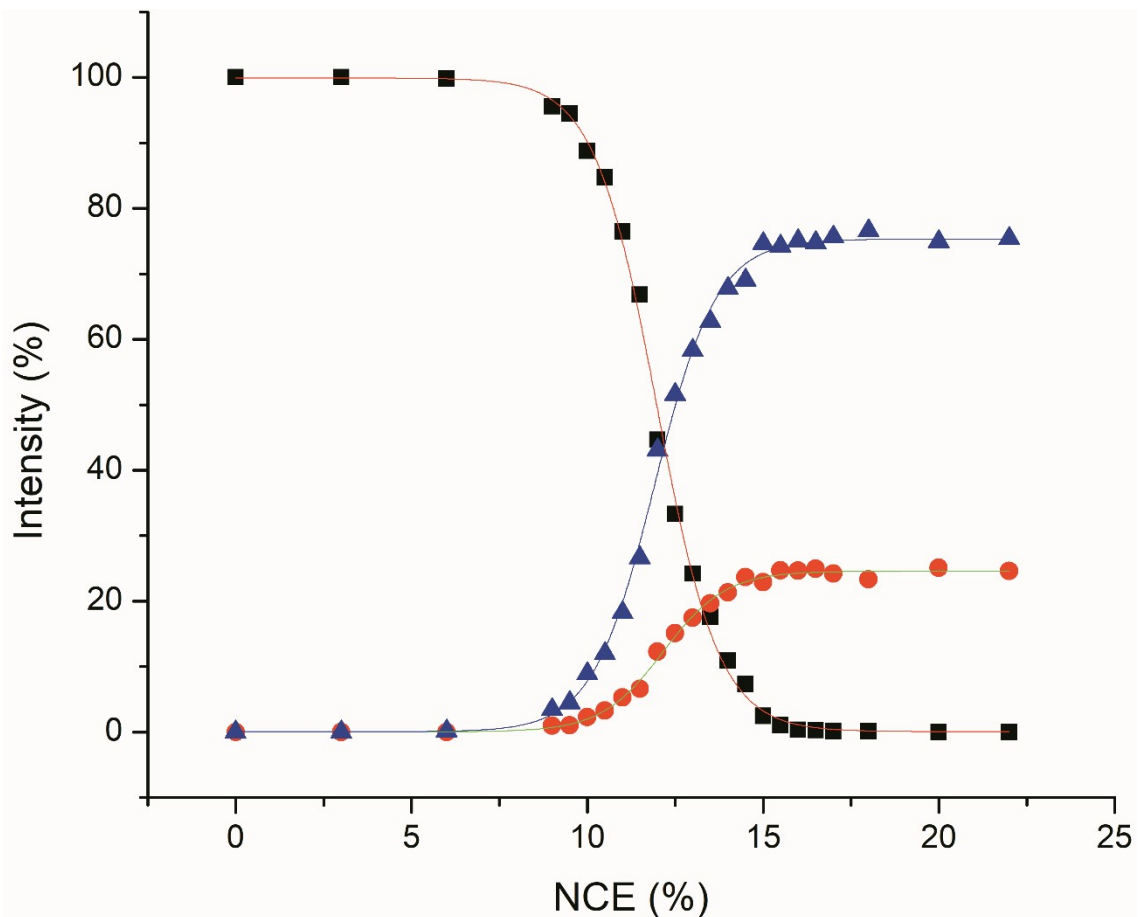

| Model           | Boltzmann                                |          |                |
|-----------------|------------------------------------------|----------|----------------|
| Equation        | $y = A2 + (A1-A2)/(1 + \exp((x-x0)/dx))$ |          |                |
| Reduced Chi-Sqr | 3,16585                                  | 0,4025   | 2,20543        |
| Adj. R-Square   | 0,99819                                  | 0,99624  | 0,99777        |
|                 |                                          | Value    | Standard Error |
| B               | A1                                       | 99,90802 | 0,89367        |
| B               | A2                                       | 0,08647  | 0,67255        |
| B               | x0                                       | 11,97249 | 0,0395         |
| B               | dx                                       | 0,88626  | 0,03383        |
| C               | A1                                       | 0,05302  | 0,31025        |
| C               | A2                                       | 24,58547 | 0,24587        |
| C               | x0                                       | 12,16442 | 0,05706        |
| C               | dx                                       | 0,88443  | 0,04917        |
| D               | A1                                       | 0,06554  | 0,75055        |
| D               | A2                                       | 75,30992 | 0,5554         |
| D               | x0                                       | 11,91039 | 0,04356        |
| D               | dx                                       | 0,88106  | 0,03724        |



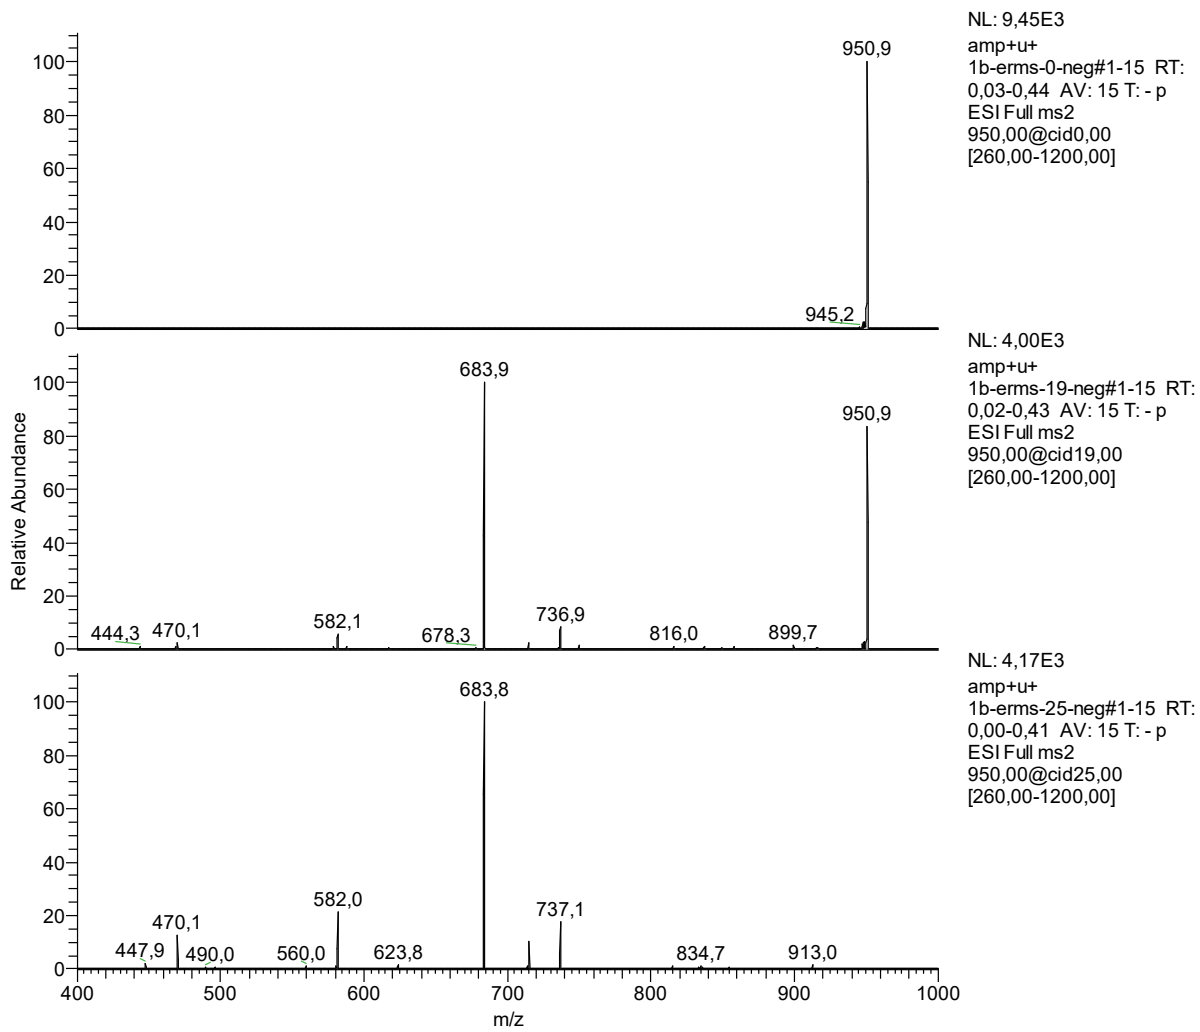

Representative CID of [S7 + APO3-+ U] triplet

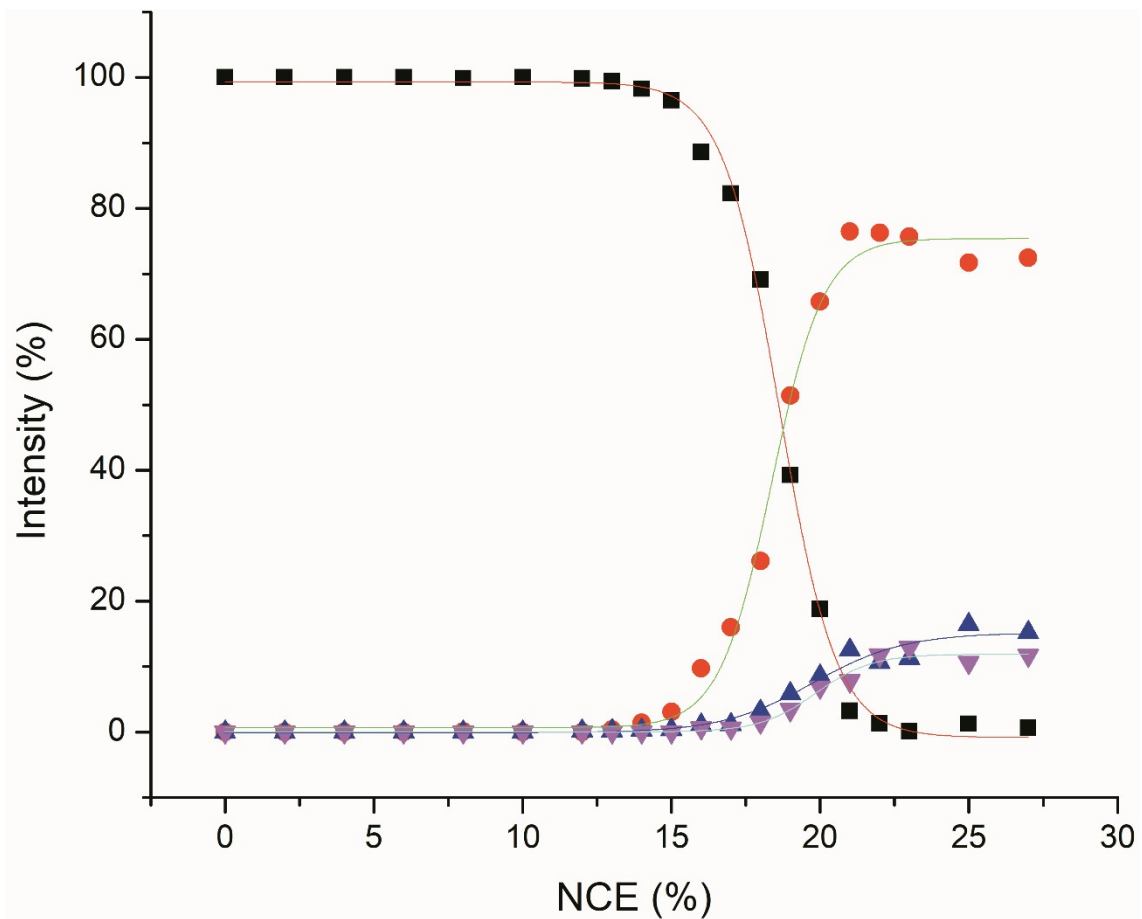

| Model           | Boltzmann                                |          |                |         |
|-----------------|------------------------------------------|----------|----------------|---------|
| Equation        | $y = A2 + (A1-A2)/(1 + \exp((x-x0)/dx))$ |          |                |         |
| Reduced Chi-Sqr | 4,03282                                  | 5,87795  | 1,02292        | 0,42936 |
| Adj. R-Square   | 0,99786                                  | 0,99464  | 0,96964        | 0,98178 |
|                 |                                          | Value    | Standard Error |         |
| Triplex         | A1                                       | 99,3073  | 0,64911        |         |
| Triplex         | A2                                       | -0,80011 | 1,07561        |         |
| Triplex         | x0                                       | 18,6342  | 0,05874        |         |
| Triplex         | dx                                       | 0,95096  | 0,05063        |         |
| D               | A1                                       | 0,68597  | 0,78232        |         |
| D               | A2                                       | 75,40231 | 1,21719        |         |
| D               | x0                                       | 18,36869 | 0,08874        |         |
| D               | dx                                       | 0,87366  | 0,07673        |         |
| F               | A1                                       | -0,08628 | 0,34752        |         |
| F               | A2                                       | 15,18762 | 0,81947        |         |
| F               | x0                                       | 19,77328 | 0,31049        |         |
| F               | dx                                       | 1,53529  | 0,25761        |         |
| H               | A1                                       | 0,03798  | 0,1994         |         |
| H               | A2                                       | 11,91487 | 0,41218        |         |
| H               | x0                                       | 19,86257 | 0,1666         |         |

H dx 0,94311 0,14108

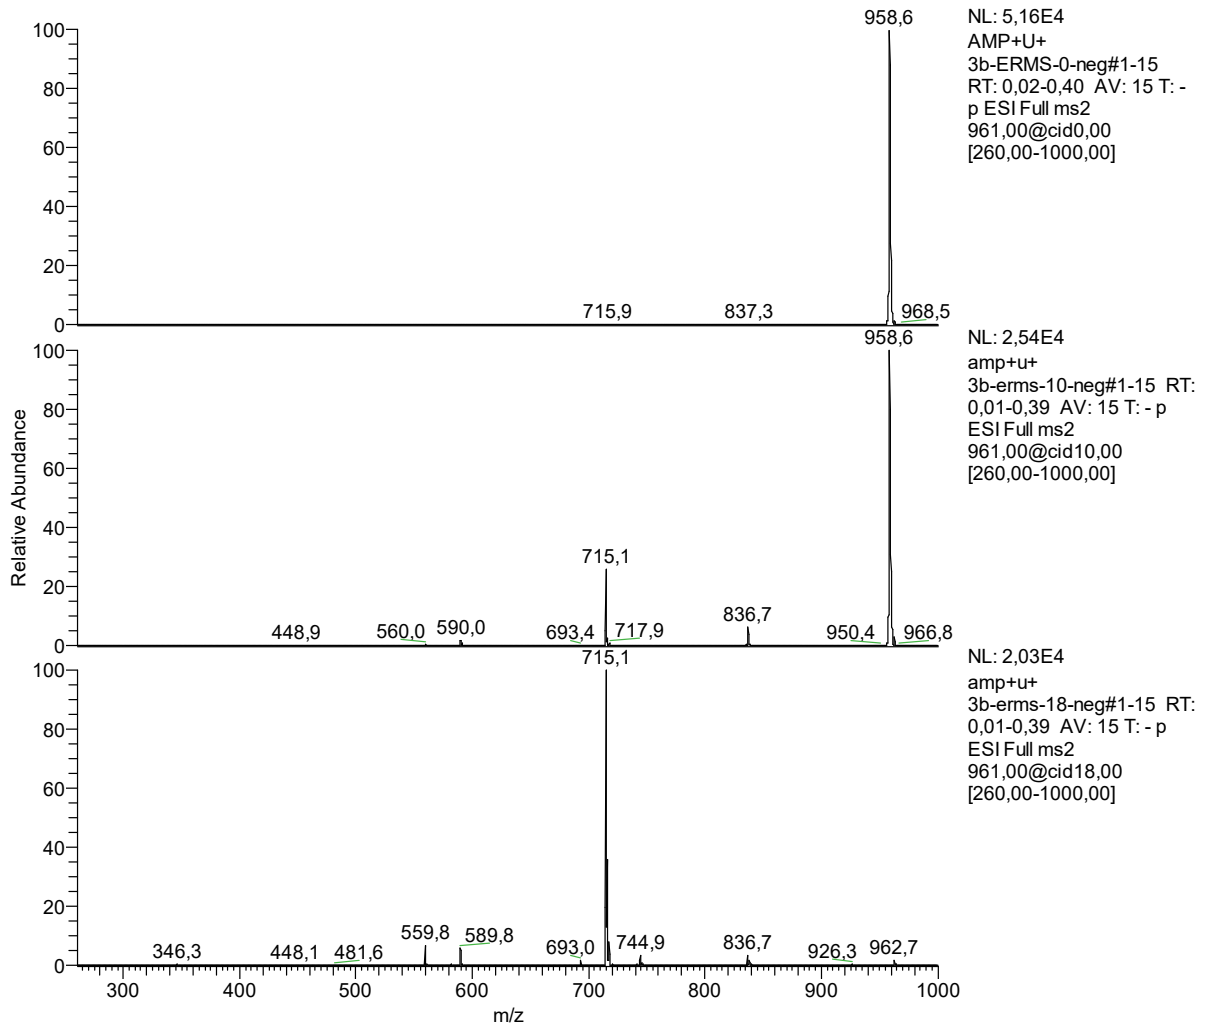

Representative CID of [S8 + APO3-+ U] triplet

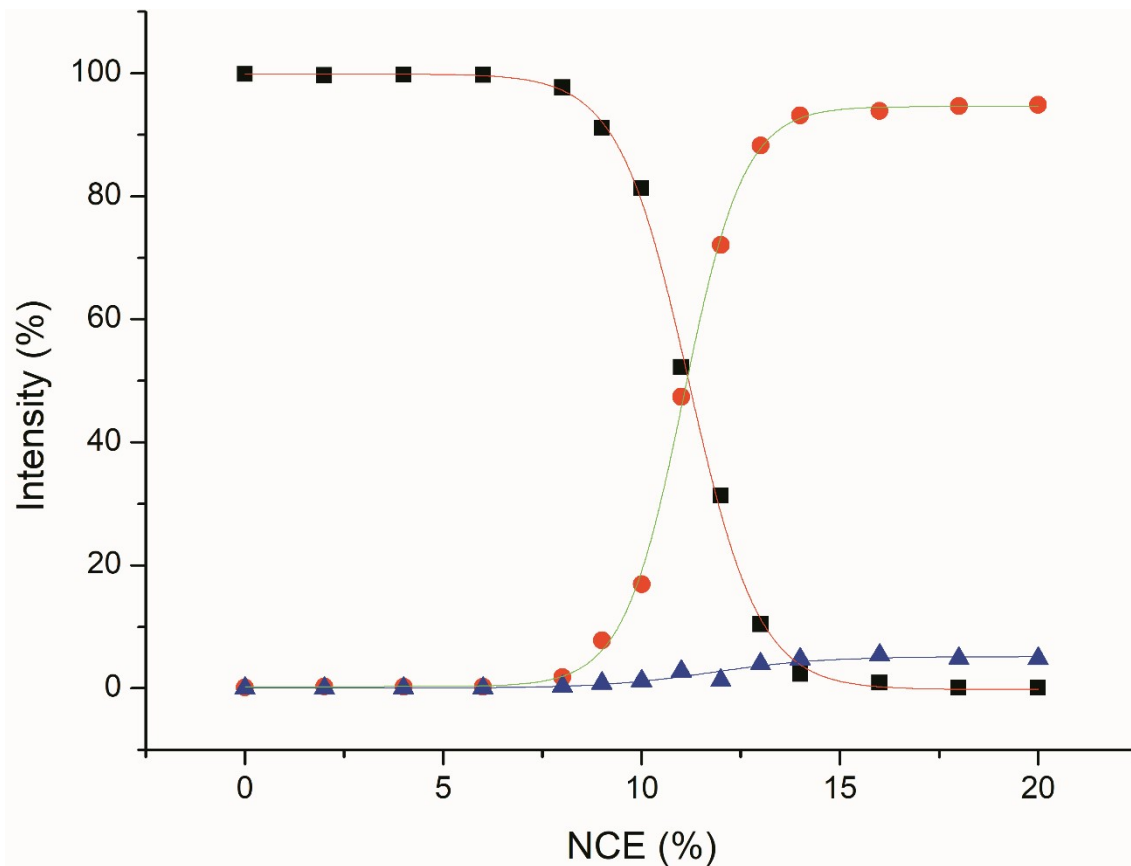

| Model           | Boltzmann                                |          |                |
|-----------------|------------------------------------------|----------|----------------|
| Equation        | $y = A2 + (A1-A2)/(1 + \exp((x-x0)/dx))$ |          |                |
| Reduced Chi-Sqr | 2,65593                                  | 1,29627  | 0,38003        |
| Adj. R-Square   | 0,99868                                  | 0,99931  | 0,91888        |
|                 |                                          | Value    | Standard Error |
| B               | A1                                       | 99,90062 | 0,75464        |
| B               | A2                                       | -0,17584 | 0,88309        |
| B               | x0                                       | 11,18948 | 0,04715        |
| B               | dx                                       | 0,88574  | 0,04029        |
| D               | A1                                       | 0,29312  | 0,51472        |
| D               | A2                                       | 94,63211 | 0,58367        |
| D               | x0                                       | 11,05905 | 0,03125        |
| D               | dx                                       | 0,76011  | 0,02686        |
| F               | A1                                       | 0,02751  | 0,31363        |
| F               | A2                                       | 5,17161  | 0,41854        |
| F               | x0                                       | 11,77622 | 0,50431        |
| F               | dx                                       | 1,3924   | 0,44846        |

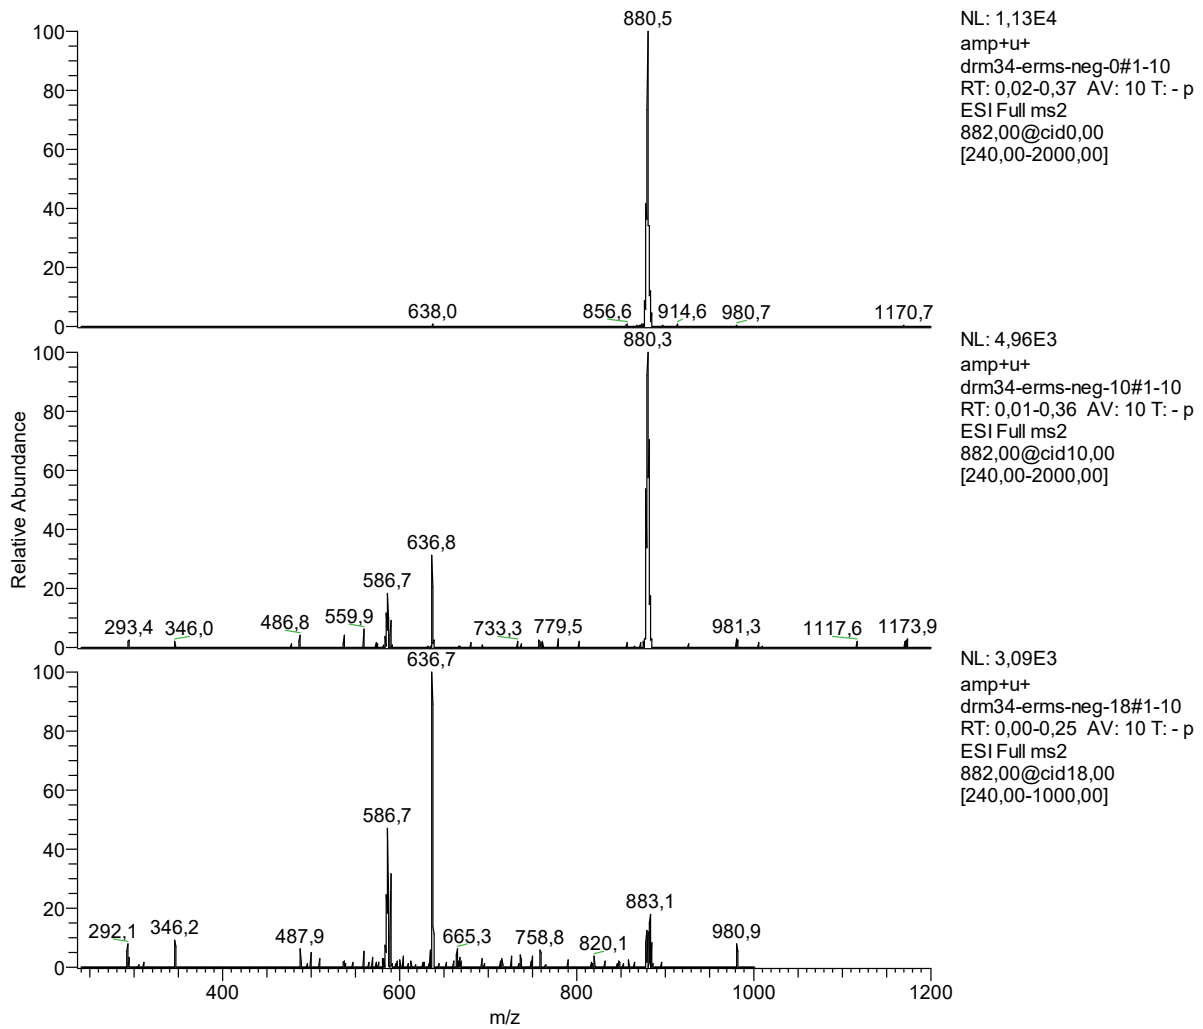

Representative CID of [S9 + APO3-+ U] triplet

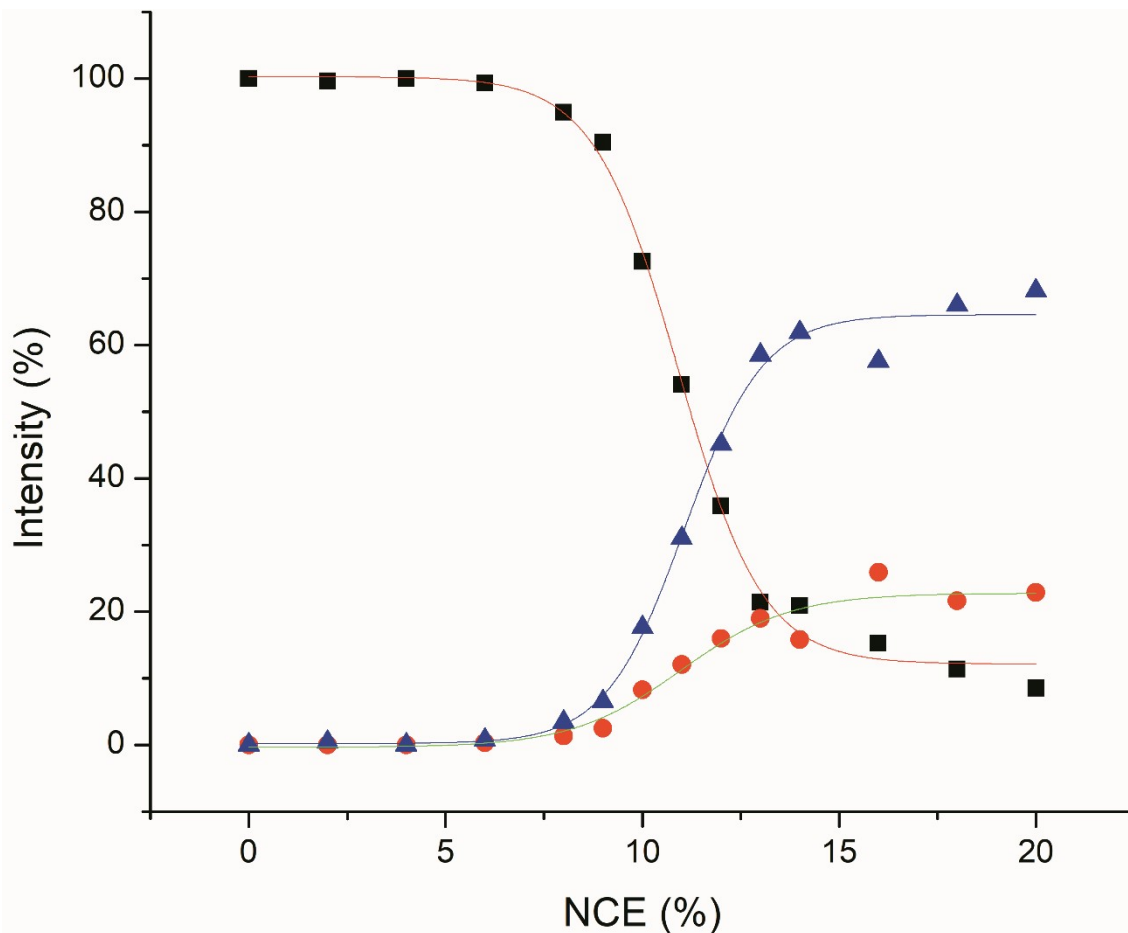

| Model           | Boltzmann                                |           |                |
|-----------------|------------------------------------------|-----------|----------------|
| Equation        | $y = A2 + (A1-A2)/(1 + \exp((x-x0)/dx))$ |           |                |
| Reduced Chi-Sqr | 5,00387                                  | 4,20009   | 6,64543        |
| Adj. R-Square   | 0,99662                                  | 0,95575   | 0,99178        |
|                 |                                          | Value     | Standard Error |
| triplex         | A1                                       | 100,28684 | 1,1085         |
| triplex         | A2                                       | 12,12818  | 1,25339        |
| triplex         | x0                                       | 10,91634  | 0,0846         |
| triplex         | dx                                       | 1,06925   | 0,07252        |
| UA              | A1                                       | -0,37136  | 1,09885        |
| UA              | A2                                       | 22,75499  | 1,28789        |
| UA              | x0                                       | 10,98052  | 0,3676         |
| UA              | dx                                       | 1,39078   | 0,32437        |
| F               | A1                                       | 0,17853   | 1,24123        |
| F               | A2                                       | 64,58008  | 1,43203        |
| F               | x0                                       | 11,06789  | 0,12675        |
| F               | dx                                       | 0,99878   | 0,10832        |

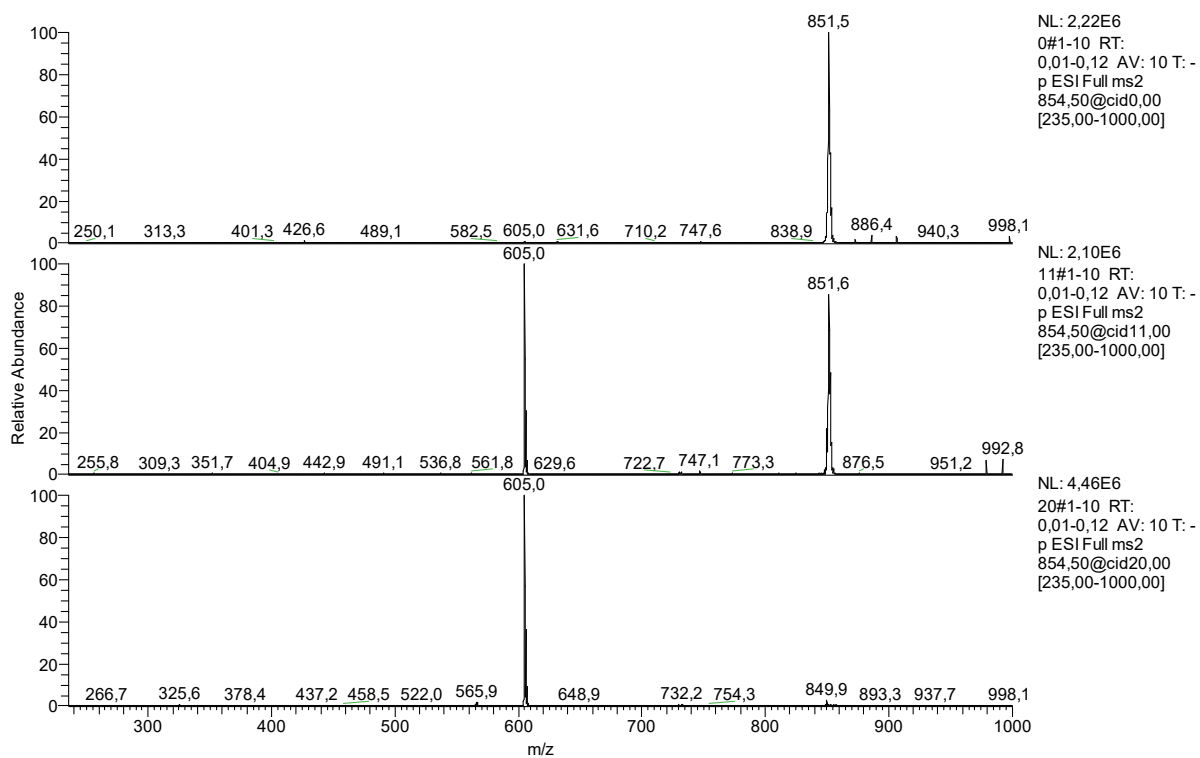

Representative CID of [HB1 + CPO3-+ G] triplet

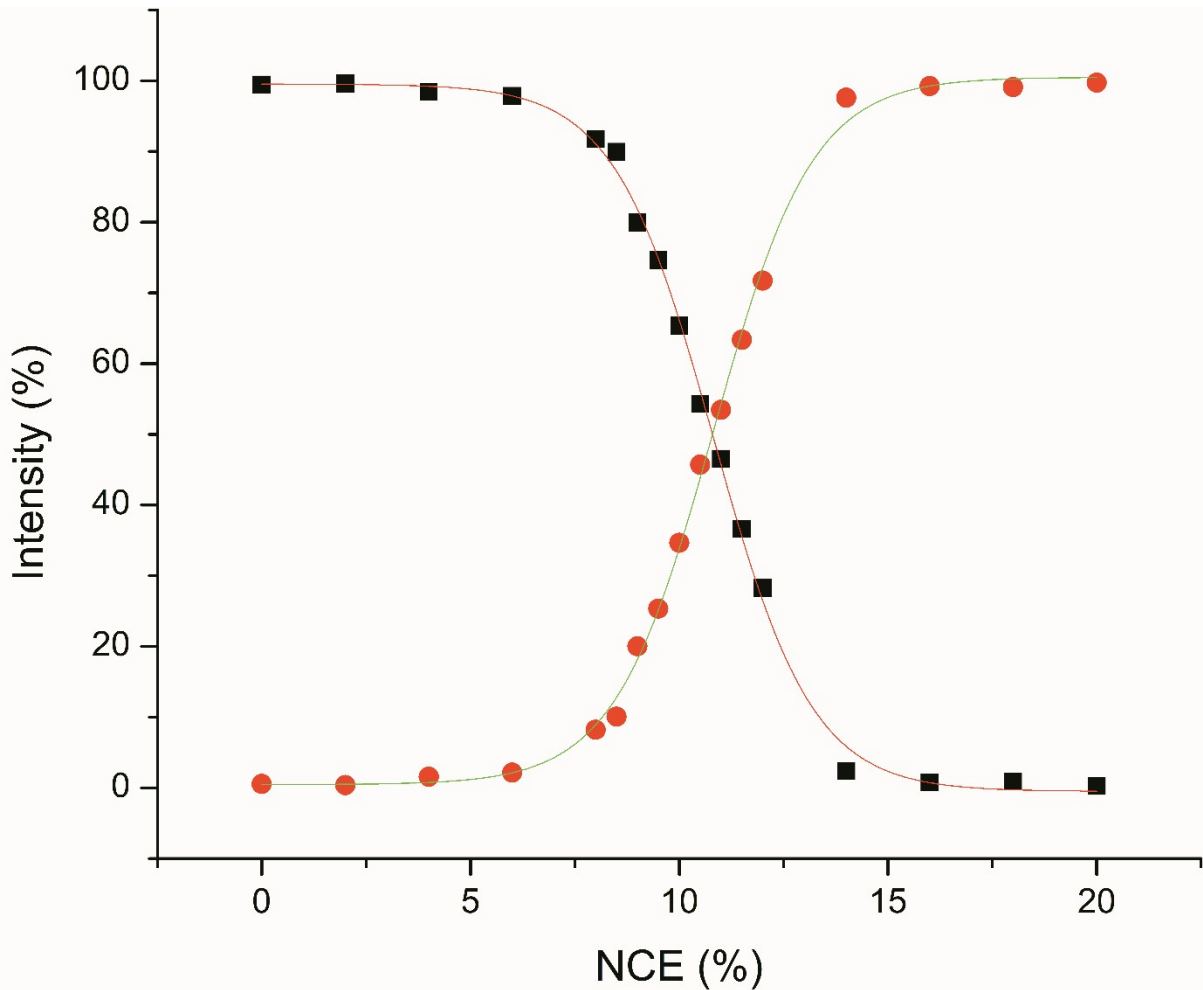

|                 |                                          |           |                |
|-----------------|------------------------------------------|-----------|----------------|
| Model           | Boltzmann                                |           |                |
| Equation        | $y = A2 + (A1-A2)/(1 + \exp((x-x0)/dx))$ |           |                |
| Reduced Chi-Sqr | 2,75827                                  | 2,75827   |                |
| Adj. R-Square   | 0,99817                                  | 0,99817   |                |
|                 |                                          | Value     | Standard Error |
| B               | A1                                       | 99,54149  | 0,84965        |
| B               | A2                                       | -0,50245  | 0,94452        |
| B               | x0                                       | 10,81938  | 0,04958        |
| B               | dx                                       | 1,18421   | 0,04717        |
| C               | A1                                       | 0,45851   | 0,84965        |
| C               | A2                                       | 100,50245 | 0,94452        |
| C               | x0                                       | 10,81938  | 0,04958        |
| C               | dx                                       | 1,18421   | 0,04717        |



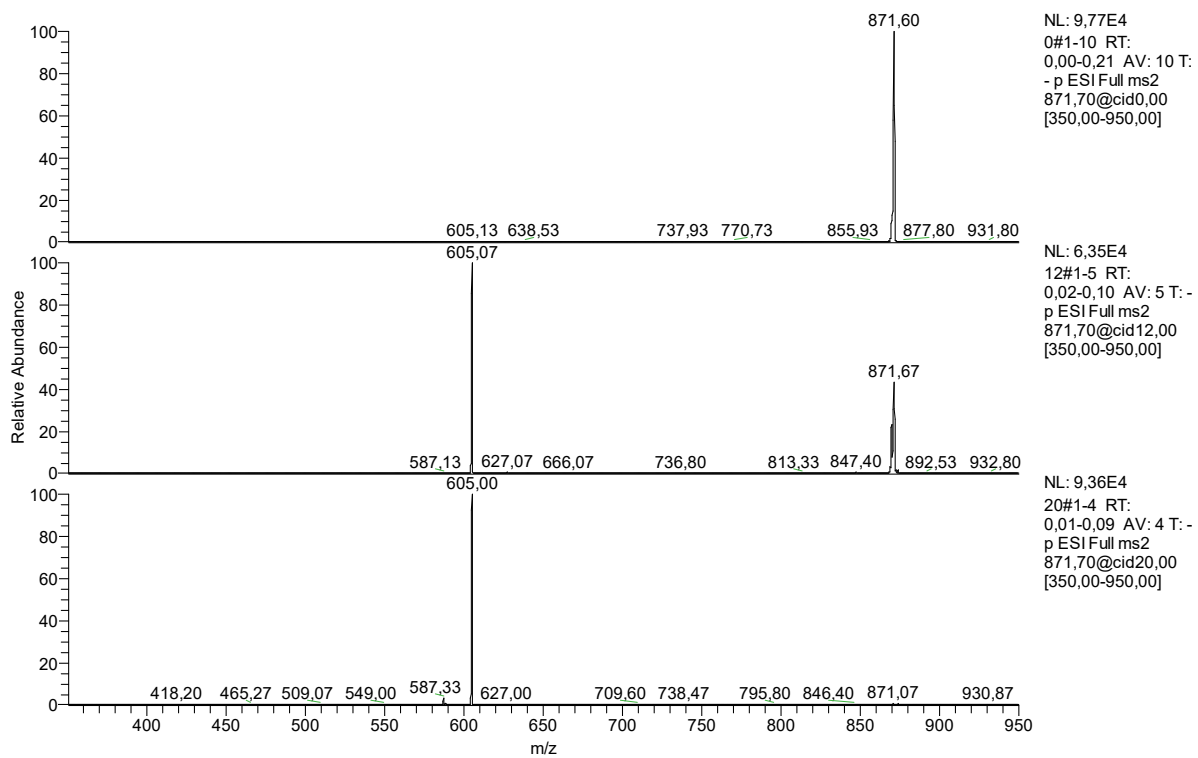

Representative CID of [HB2 + CPO3-+ G] triplet

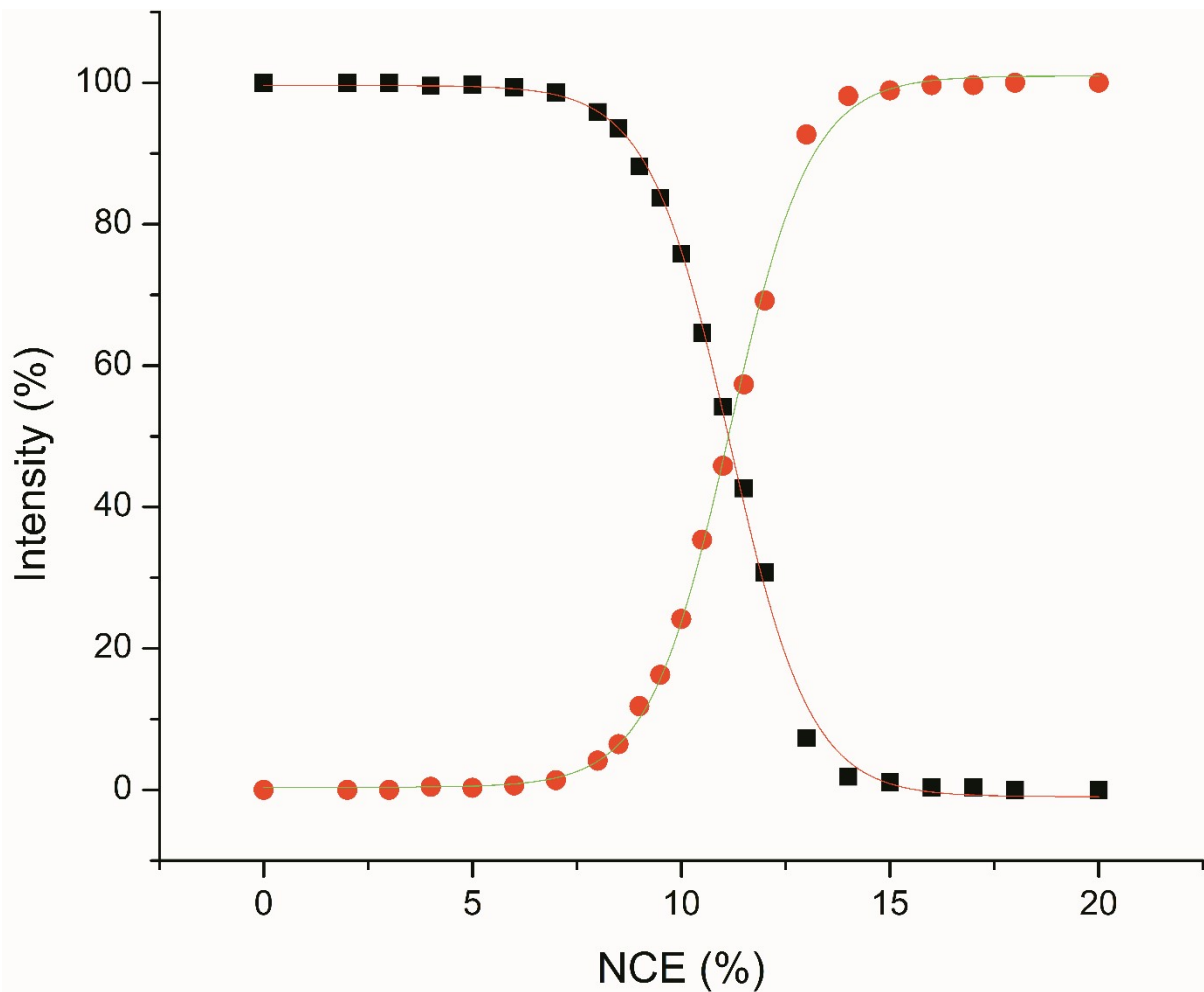

|                 |                                          |           |                |
|-----------------|------------------------------------------|-----------|----------------|
| Model           | Boltzmann                                |           |                |
| Equation        | $y = A2 + (A1-A2)/(1 + \exp((x-x0)/dx))$ |           |                |
| Reduced Chi-Sqr | 2,40393                                  | 2,40393   |                |
| Adj. R-Square   | 0,99868                                  | 0,99868   |                |
|                 |                                          | Value     | Standard Error |
| B               | A1                                       | 99,6328   | 0,57412        |
| B               | A2                                       | -0,96603  | 0,69762        |
| B               | x0                                       | 11,15538  | 0,03599        |
| B               | dx                                       | 0,96596   | 0,0332         |
| C               | A1                                       | 0,3672    | 0,57412        |
| C               | A2                                       | 100,96603 | 0,69762        |
| C               | x0                                       | 11,15538  | 0,03599        |
| C               | dx                                       | 0,96596   | 0,0332         |

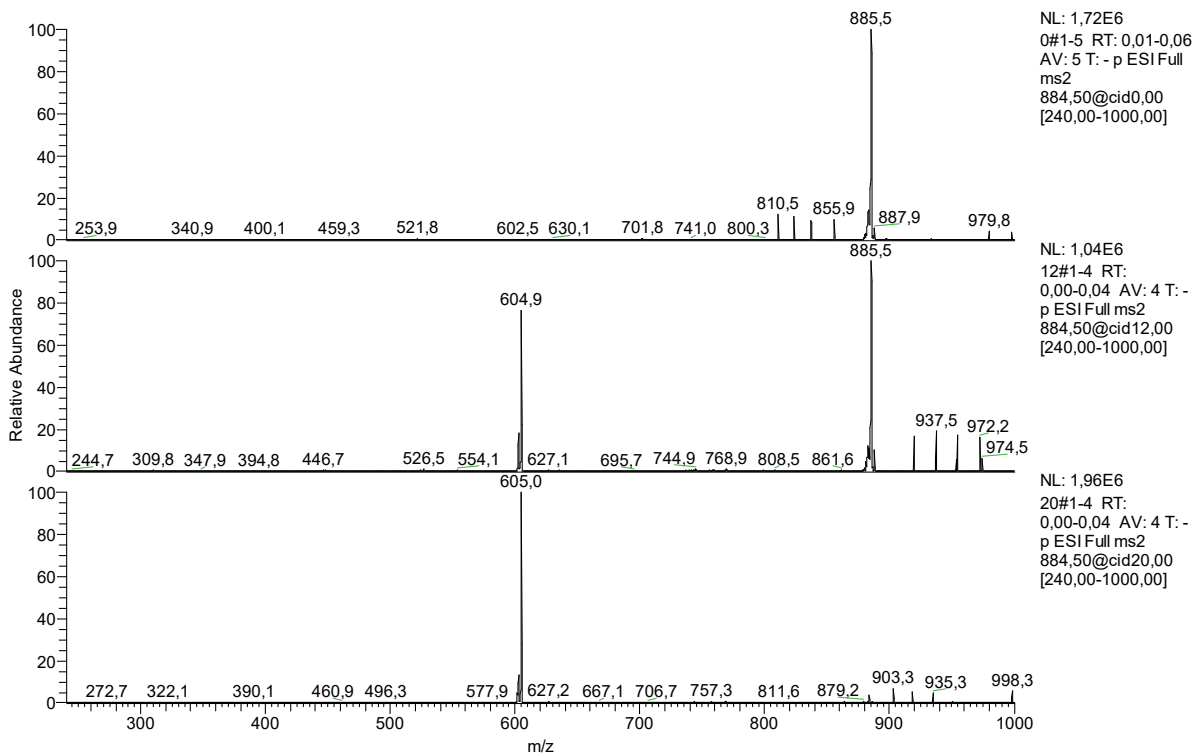

Representative CID of [HB3 + CPO3-+ G] triplet

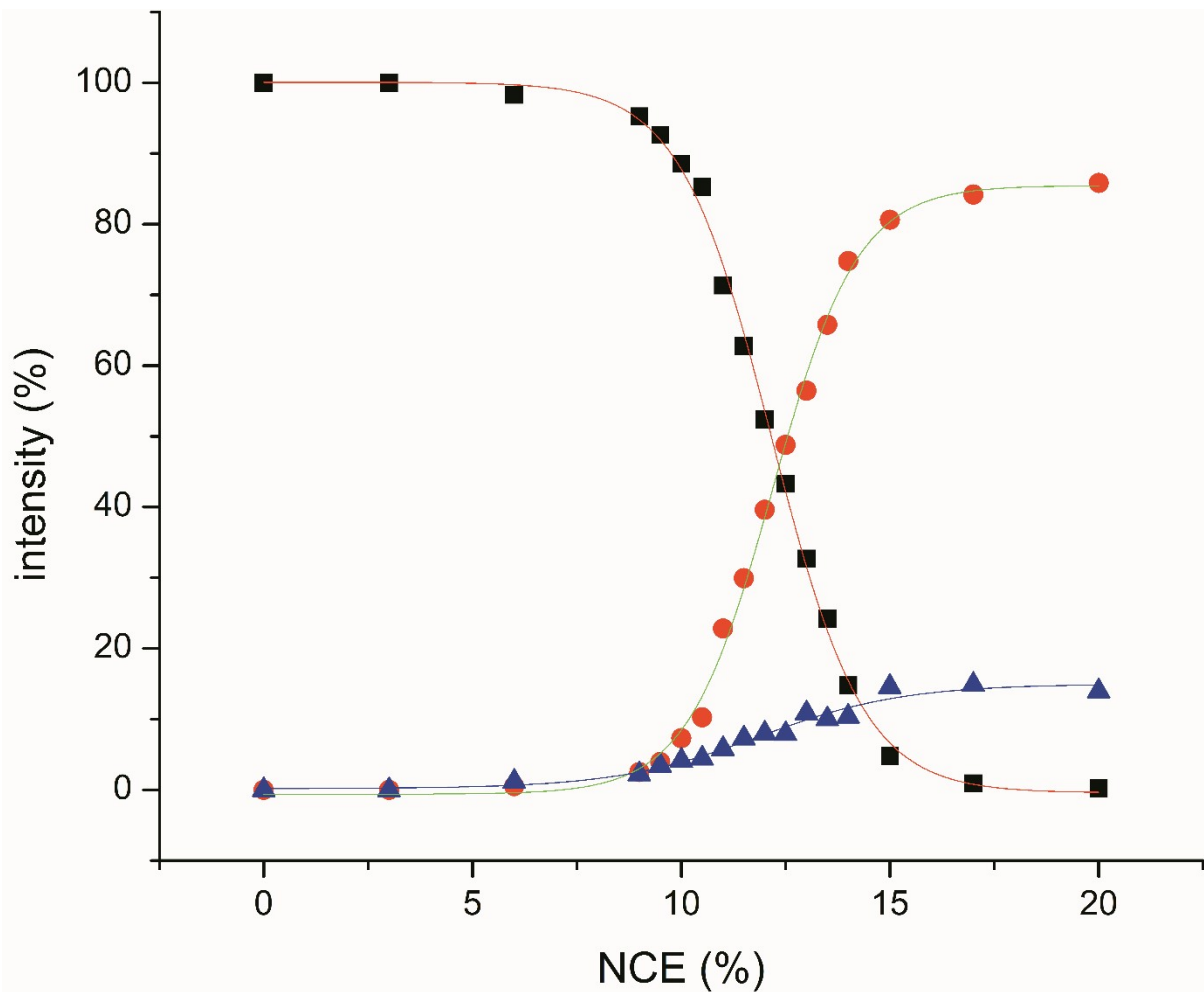

| Model           | Boltzmann                                |           |                |
|-----------------|------------------------------------------|-----------|----------------|
| Equation        | $y = A2 + (A1-A2)/(1 + \exp((x-x0)/dx))$ |           |                |
| Reduced Chi-Sqr | 2,81673                                  | 2,72473   | 0,69269        |
| Adj. R-Square   | 0,99803                                  | 0,99751   | 0,97149        |
|                 |                                          | Value     | Standard Error |
| B               | A1                                       | 100,07733 | 0,89472        |
| B               | A2                                       | -0,42085  | 1,14961        |
| B               | x0                                       | 12,16348  | 0,05           |
| B               | dx                                       | 1,09748   | 0,042          |
| C               | A1                                       | -0,60418  | 0,85554        |
| C               | A2                                       | 85,47509  | 1,09855        |
| C               | x0                                       | 12,18518  | 0,05351        |
| C               | dx                                       | 1,01966   | 0,04505        |
| D               | A1                                       | 0,18431   | 0,53218        |
| D               | A2                                       | 14,97871  | 0,71861        |
| D               | x0                                       | 11,87765  | 0,27129        |
| D               | dx                                       | 1,72958   | 0,24068        |

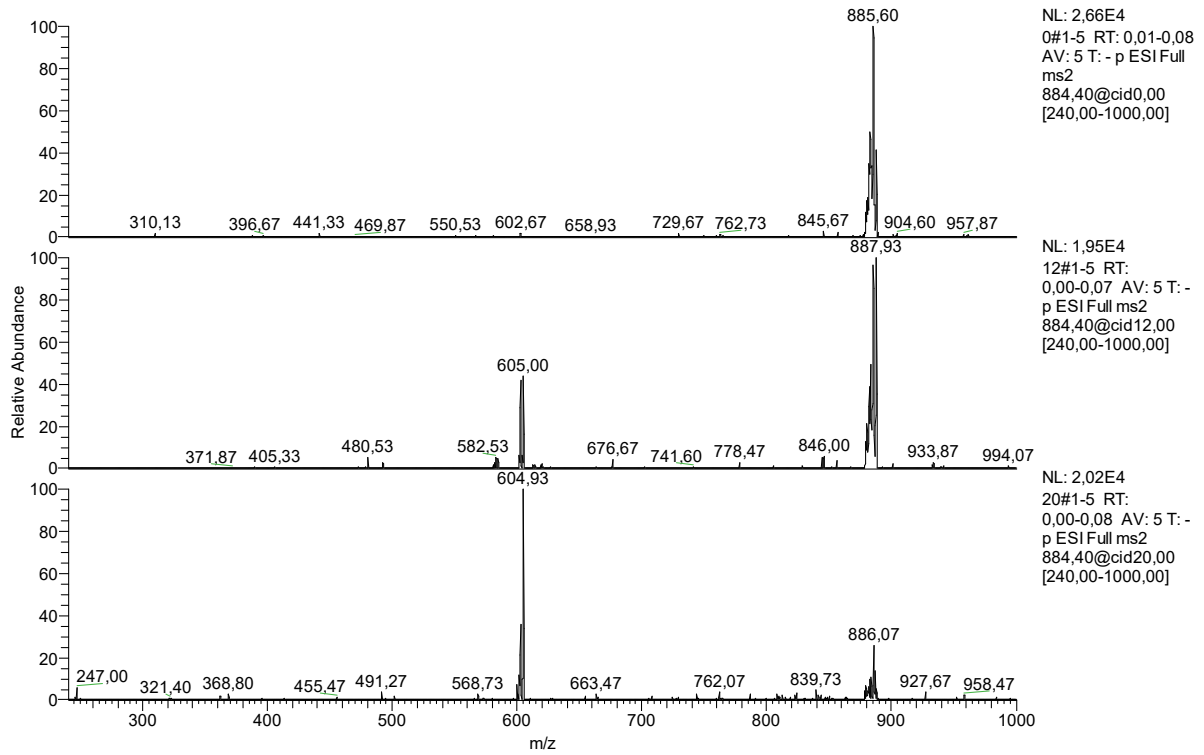

Representative CID of [HB4 + CPO3-+ G] triplet

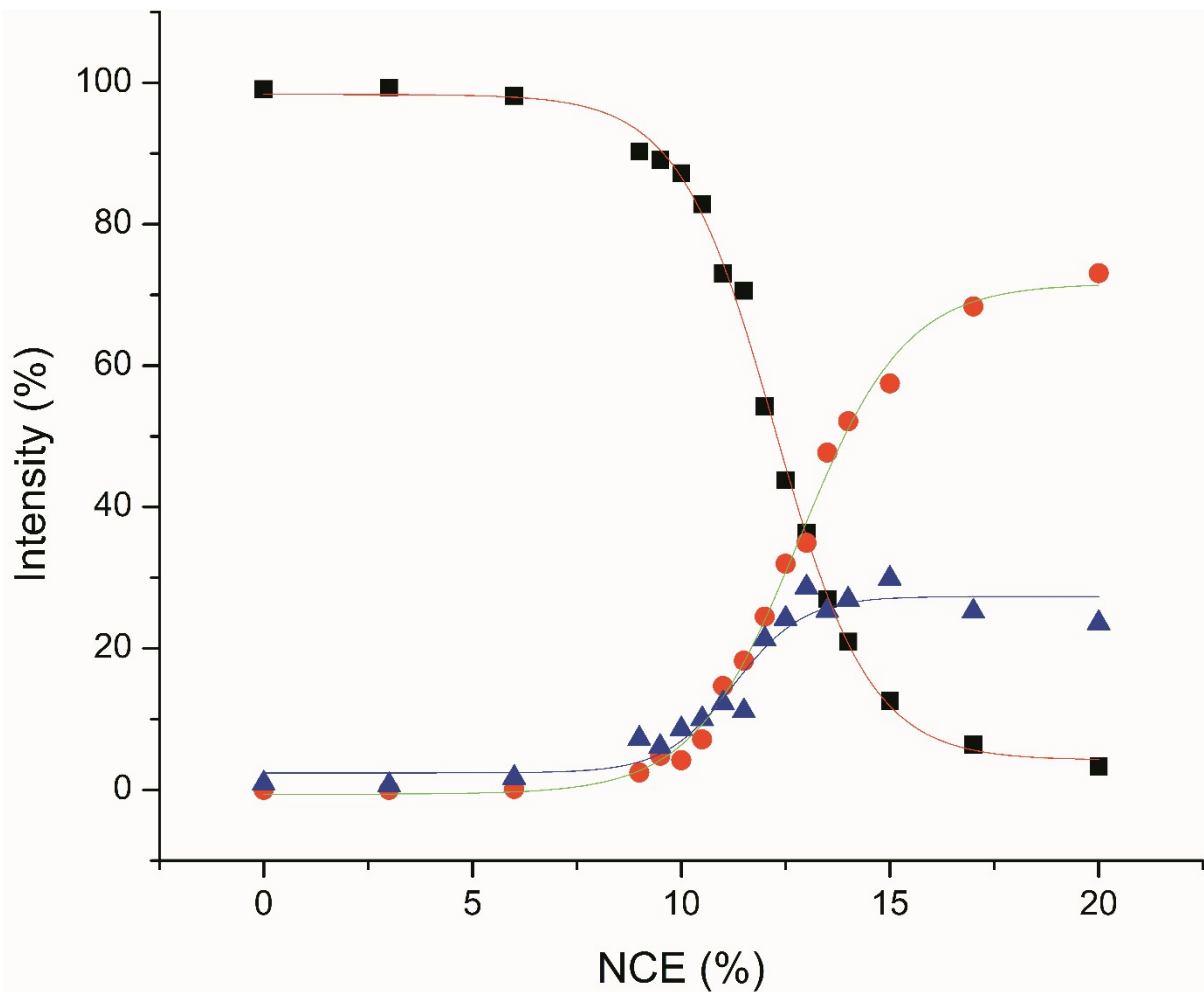

| Model           | Boltzmann                                |          |                |
|-----------------|------------------------------------------|----------|----------------|
| Equation        | $y = A2 + (A1-A2)/(1 + \exp((x-x0)/dx))$ |          |                |
| Reduced Chi-Sqr | 3,68022                                  | 3,49479  | 7,57601        |
| Adj. R-Square   | 0,997                                    | 0,99458  | 0,93131        |
|                 |                                          | Value    | Standard Error |
| B               | A1                                       | 98,35538 | 1,03012        |
| B               | A2                                       | 4,20597  | 1,34907        |
| B               | x0                                       | 12,23021 | 0,06348        |
| B               | dx                                       | 1,14126  | 0,05347        |
| C               | A1                                       | -0,6092  | 0,98709        |
| C               | A2                                       | 71,61115 | 1,49099        |
| C               | x0                                       | 12,83243 | 0,09158        |
| C               | dx                                       | 1,26502  | 0,07954        |
| D               | A1                                       | 2,40469  | 1,48941        |
| D               | A2                                       | 27,35844 | 1,4577         |
| D               | x0                                       | 11,25928 | 0,25337        |
| D               | dx                                       | 0,83605  | 0,21293        |

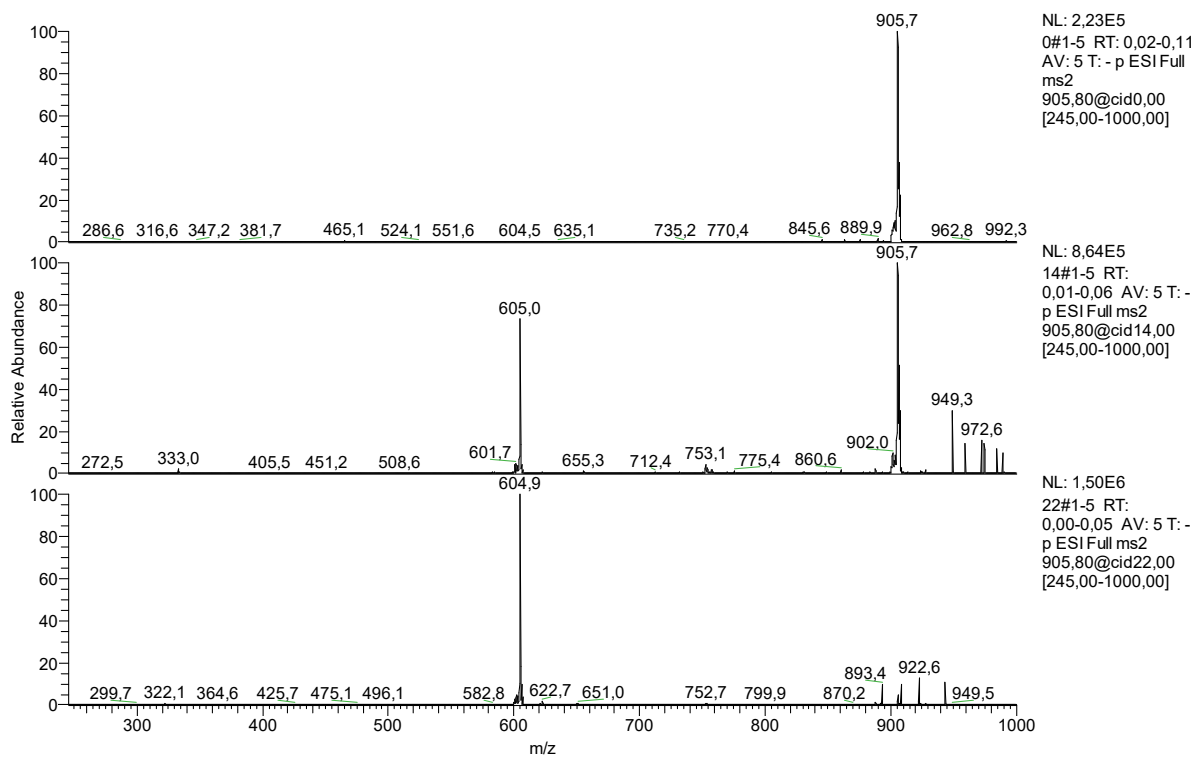

Representative CID of  $[\text{HB}_5 + \text{CPO}_3^- + \text{G}]$  triplet

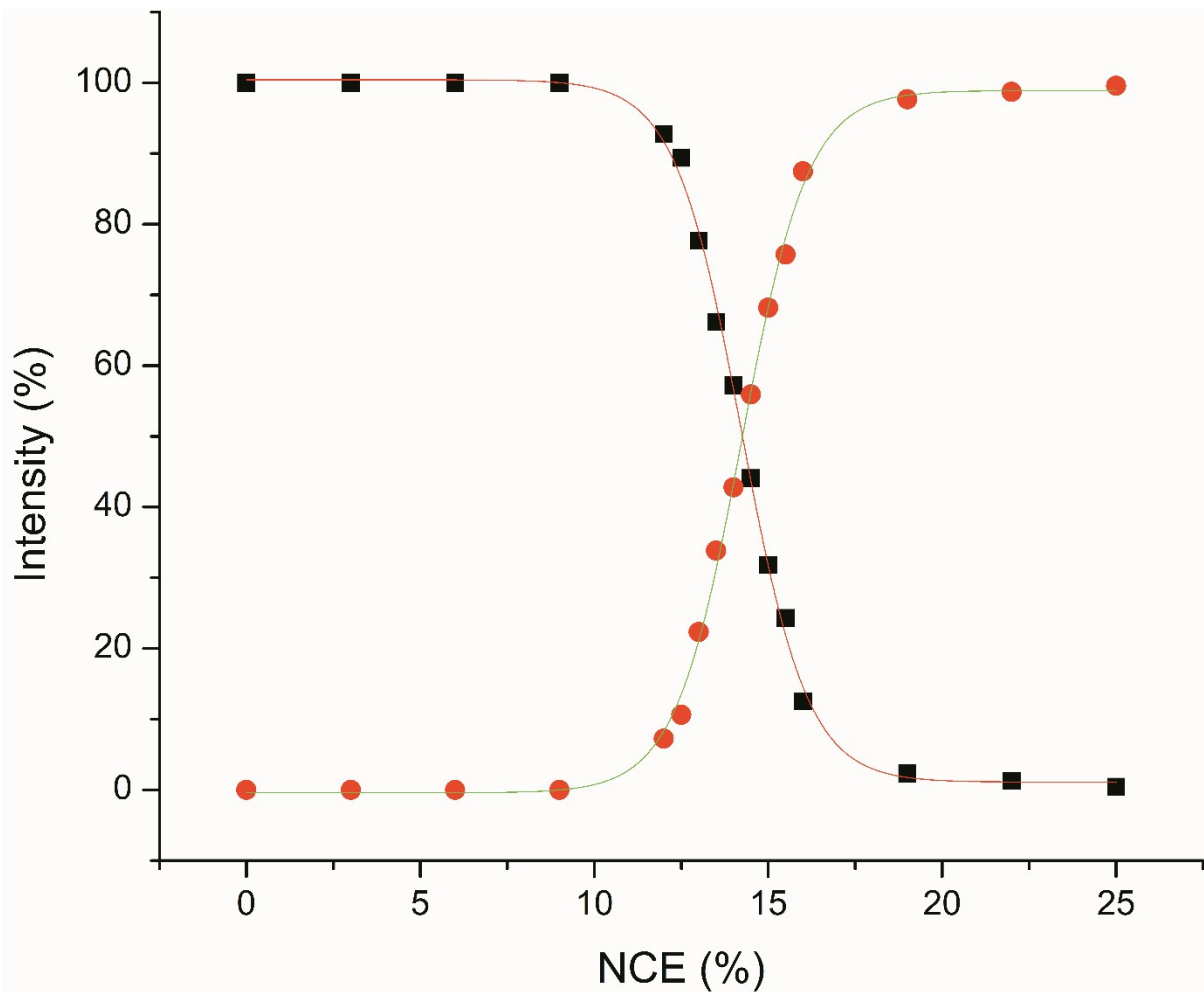

|                 |                                          |           |                |
|-----------------|------------------------------------------|-----------|----------------|
| Model           | Boltzmann                                |           |                |
| Equation        | $y = A2 + (A1-A2)/(1 + \exp((x-x0)/dx))$ |           |                |
| Reduced Chi-Sqr | 2,51803                                  | 2,51803   |                |
| Adj. R-Square   | 0,99838                                  | 0,99838   |                |
|                 |                                          | Value     | Standard Error |
| B               | A1                                       | 100,42859 | 0,77595        |
| B               | A2                                       | 1,09018   | 0,9154         |
| B               | x0                                       | 14,23032  | 0,04005        |
| B               | dx                                       | 0,95505   | 0,03376        |
| C               | A1                                       | -0,42859  | 0,77595        |
| C               | A2                                       | 98,90982  | 0,9154         |
| C               | x0                                       | 14,23032  | 0,04005        |
| C               | dx                                       | 0,95505   | 0,03376        |
